# Supplementary material
Source: Royal Society of Chemistry journal article supplement (doi:10.1039/d6cy00261g)
Supplement: d6cy00261g1.pdf [file d6cy00261g1.pdf]

SUPPORTING INFORMATION FOR

# On the reactions of (hetero)aryl and vinyl triflates with [Ni(COD)(dppf)]

Nicholas C. C. McVeigh,<sup>a</sup> Megan E. Greaves,<sup>a</sup> Rachel H. Munday,<sup>b</sup> Thomas O. Ronson,<sup>b</sup> Scott Rice,<sup>b</sup>  
Stephen Sproules,<sup>c</sup> and David J. Nelson<sup>a\*</sup>

- (a) Department of Pure and Applied Chemistry, University of Strathclyde, 295 Cathedral Street, Glasgow, G1 1XL  
(b) Chemical Development, Pharmaceutical Research and Development, Operations, AstraZeneca, Macclesfield, SK10 2NA  
(c) School of Chemistry, University of Glasgow, University Avenue, Glasgow, G12 9QQ

## Contents

|        |                                   |    |
|--------|-----------------------------------|----|
| 1      | Synthetic Chemistry               | 3  |
| 1.1    | General Information               | 3  |
| 1.2    | Characterisation Data             | 4  |
| 1.2.1  | Alk-1-en-1-yl Triflates           | 4  |
| 1.2.2  | (Hetero)Aryl Triflates            | 5  |
| 1.2.3  | Other Electrophiles               | 6  |
| 1.2.4  | Reaction Products                 | 6  |
| 2      | Kinetic Studies                   | 8  |
| 2.1    | Methodology                       | 8  |
| 2.2    | Kinetic Data                      | 8  |
| 2.2.1  | Phenyl triflate (2b)              | 8  |
| 2.2.3  | Chlorobenzene (8)                 | 10 |
| 2.2.4  | Phenyl tosylate (9)               | 12 |
| 2.2.5  | 2-Pyridinyl triflate (2b)         | 15 |
| 2.2.6  | 3-Pyridinyl triflate (2d)         | 19 |
| 2.2.7  | Cyclopent-1-en-1-yl triflate (5a) | 20 |
| 2.2.8  | Cyclohex-1-en-1-yl triflate (5b)  | 21 |
| 2.2.9  | Cyclohept-1-en-1-yl triflate (5c) | 22 |
| 2.2.10 | Cyclooct-1-en-1-yl triflate (5d)  | 24 |
| 2.3    | VTNA Treatment                    | 25 |

|       |                                              |    |
|-------|----------------------------------------------|----|
| 3     | Measurement of Equilibrium Constants .....   | 30 |
| 3.1   | Methodology.....                             | 30 |
| 3.2   | Equilibrium Constants.....                   | 30 |
| 4     | Cross-Coupling Reactions .....               | 31 |
| 4.1   | General Procedure.....                       | 31 |
| 4.2   | Cross-Coupling Reaction Outcomes .....       | 31 |
| 5     | NMR Spectra.....                             | 32 |
| 5.1   | Alk-1-en-1-yl Triflates .....                | 32 |
| 5.2   | (Hetero)Aryl Triflates .....                 | 38 |
| 5.3   | Other Electrophiles.....                     | 41 |
| 5.4   | Reaction Products.....                       | 42 |
| 6     | EPR Spectra.....                             | 44 |
| 7     | Computational Studies .....                  | 46 |
| 7.1   | Methodology.....                             | 46 |
| 7.1.1 | Conformational Searches.....                 | 46 |
| 7.1.2 | DFT Calculations .....                       | 46 |
| 7.2   | Computational Results.....                   | 47 |
| 7.2.1 | Benchmarking: Geometry Optimisations.....    | 47 |
| 7.2.2 | Benchmarking: Single Point Calculations..... | 47 |
| 7.2.3 | Alternative Pathways .....                   | 48 |
| 7.2.4 | Table of Energies .....                      | 53 |
| 7.2.5 | Cartesian Coordinates.....                   | 57 |
| 8     | References .....                             | 58 |

# 1 Synthetic Chemistry

## 1.1 General Information

Anhydrous solvents for synthetic work were obtained from an Inert Technology PureSolv apparatus; water content was less than 10 ppm, as judged from regular Karl-Fischer analyses of samples withdrawn from the apparatus. All deuterated solvents were obtained from commercial sources. Those used for kinetic studies were dried overnight on 4 Å molecular sieves before use.

Any manipulations of air-sensitive nickel complexes were carried out under nitrogen or argon using Schlenk techniques or in an argon-filled glovebox (<0.1 ppm oxygen; <0.1 ppm water). Substrates used in kinetic experiments and cross-coupling reactions were obtained from commercial sources and used as supplied, unless stated otherwise. Details of substrates prepared for this work are provided in sections 1.3.1 and 1.3.2. 4-(Trifluoromethyl)phenyl triflate<sup>1</sup> and pyridin-2-yl triflate<sup>2</sup> were prepared as documented in our previous studies. Cross-coupling products (1-phenylcycloalkenes) were prepared according to a literature method.<sup>3</sup> [Ni(COD)(dppf)] was prepared according to a literature procedure.<sup>4</sup>

NMR spectroscopy was performed using Bruker NMR spectrometers, either: (i) an AV3-400 equipped with a liquid nitrogen cryoprobe; (ii) an AV3-400Nano equipped with a BBFO-z-ATMA probe and temperature control; (iii) an AV3-500HD equipped with a smartprobe and temperature control; or (iv) an AVII-600 equipped with a BBO-z-ATMA probe and temperature control. All kinetic experiments were performed using the AV3-400Nano or the AVII-600. <sup>1</sup>H NMR chemical shifts are reported relative to residual solvent signals.<sup>5</sup> <sup>13</sup>C{<sup>1</sup>H} NMR chemical shifts are reported relative to deuterated solvent signals.<sup>5</sup> <sup>19</sup>F and <sup>31</sup>P NMR chemical shifts are reported relative to external standards. Chemical shifts are reported in ppm and scalar couplings are reported in Hertz (Hz).

GC-MS analyses were carried out using an Agilent 7890A gas chromatograph fitted with a RESTEK RXi-5Sil column (30 m × 0.32 mm × 0.25 μm) and an Agilent 6975C MSD running in EI mode. GC-FID analyses were carried out using an Agilent 7890A gas chromatograph fitted with an Agilent HP5 column (30 m × 0.25 mm I.D. × 0.25 μm).

X-band EPR spectra were collected on a Bruker ELEXSYS E500 spectrometer and simulations were performed using Bruker's Xsophe software package.

## 1.2 Characterisation Data

### 1.2.1 Alk-1-en-1-yl Triflates

**General Procedure A: Synthesis of Alk-1-en-1-yl Triflates.** These were prepared following a literature procedure.<sup>6</sup> DTBMP (11 mmol, 1.1 equiv.) was added to a solution of the corresponding ketone (10 mmol, 1 equiv.) in DCM (30 mL) at 0°C. Tf<sub>2</sub>O (12 mmol, 1.2 equiv.) was added dropwise, and the solution was warmed to room temperature and stirred overnight. The solvent was removed *in vacuo*, and the crude solid was dissolved in petroleum ether and filtered to remove pyridinium triflate. This solution was washed with cold HCl (1 M) and brine, dried over Na<sub>2</sub>SO<sub>4</sub>, and concentrated. The product was then purified by distillation at low pressure.

**Cyclopent-1-en-1-yl triflate (5a).** Synthesised according to General Procedure A from cyclopentanone (0.88 mL, 10 mmol). Isolated as a colourless oil (0.52 g, 24%).

**<sup>1</sup>H NMR** (400 MHz, CDCl<sub>3</sub>): δ 5.63 (p, *J*<sub>HH</sub> = 2.3, 1H), 2.60-2.54 (m, 2H), 2.44-2.39 (m, 2H), 2.07-1.99 (m, 2H).

**<sup>13</sup>C{<sup>1</sup>H} NMR** (101 MHz, CDCl<sub>3</sub>): δ 149.7, 118.7 (d, *J*<sub>CF</sub> = 321.0, CF<sub>3</sub>), 117.9, 31.0, 28.1, 21.0.

**<sup>19</sup>F{<sup>1</sup>H} NMR** (376 MHz, CDCl<sub>3</sub>): δ -73.6 (s, 3F, CF<sub>3</sub>).

NMR data are consistent with the literature.<sup>6</sup>

**Cyclohex-1-en-1-yl triflate (5b).** Synthesised according to General Procedure A from cyclohexanone (1.04 mL, 10 mmol). Isolated as a colourless oil (1.27 g, 54%).

**<sup>1</sup>H NMR** (400 MHz, CDCl<sub>3</sub>): δ 5.75 (tt, *J*<sub>HH</sub> = 4.0, 1.5 Hz, 1H), 2.33-2.28 (m, 2H), 2.19-2.14 (m, 2H), 1.80-1.74 (m, 2H), 1.62-1.58 (m, 2H)

**<sup>13</sup>C{<sup>1</sup>H} NMR** (101 MHz, CDCl<sub>3</sub>): δ 149.5, 118.7 (d, *J*<sub>CF</sub> = 320.2, CF<sub>3</sub>), 118.6, 27.7, 24.0, 22.8, 21.1.

**<sup>19</sup>F{<sup>1</sup>H} NMR** (376 MHz, CDCl<sub>3</sub>): δ -74.1 (s, 3F, CF<sub>3</sub>).

NMR data are consistent with the literature.<sup>6</sup>

**Cyclohept-1-en-1-yl triflate (5c).** Synthesised from cycloheptanone (2.40 mL, 20 mmol) following the general procedure. Isolated as a colourless oil (2.83 g, 58%).

**<sup>1</sup>H NMR** (400 MHz, CDCl<sub>3</sub>): δ 5.88 (t, *J*<sub>HH</sub> = 6.4 Hz, 1H), 2.53-2.51 (m, 2H), 2.16 (ddt, *J*<sub>HH</sub> = 11.3, 6.4, 1.3 Hz, 2H), 1.76-1.60 (m, 6H).

**<sup>13</sup>C{<sup>1</sup>H} NMR** (101 MHz, CDCl<sub>3</sub>): δ 153.2, 123.2, 118.7 (d, *J*<sub>CF</sub> = 320.2, CF<sub>3</sub>), 33.4, 30.0, 26.5, 24.93, 24.88.

**<sup>19</sup>F{<sup>1</sup>H} NMR** (376 MHz, CDCl<sub>3</sub>): δ -74.0 (s, 3F, CF<sub>3</sub>).

NMR data are consistent with the literature.<sup>6</sup>

**Cyclooct-1-en-1-yl triflate (5d).** Synthesised from cyclooctanone (1.26 g, 10 mmol) following the general procedure. Isolated as a colourless oil (1.48 g, 62%).

**<sup>1</sup>H NMR** (400 MHz, CDCl<sub>3</sub>): δ 5.69 (t, *J*<sub>HH</sub> = 8.7 Hz, 1H), 2.49-2.45 (m, 2H), 2.19-2.14 (m, 2H), 1.75-1.69 (m, 2H), 1.65-1.53 (m, 6H).

**<sup>13</sup>C{<sup>1</sup>H} NMR** (101 MHz, CDCl<sub>3</sub>): δ 151.1, 120.7, 118.7 (d, *J*<sub>CF</sub> = 319.8 Hz), 29.7, 29.2, 27.3, 25.9, 25.6, 25.1.

**<sup>19</sup>F{<sup>1</sup>H} NMR** (376 MHz, CDCl<sub>3</sub>): δ -74.2 (s, 3F, CF<sub>3</sub>).

NMR data are consistent with the literature.<sup>6</sup>

### 1.2.2 (Hetero)Aryl Triflates

**General Procedure B: Synthesis of (Hetero)Aryl Triflates.** These were prepared following a literature procedure.<sup>7</sup> The corresponding phenol or pyridinol (1 equiv.) was added to a biphasic mixture of toluene (40 mL) and aqueous K<sub>3</sub>PO<sub>4</sub> (40 mL, 30% w/v), after which the reaction was cooled to 0 °C. Tf<sub>2</sub>O (1.2 equiv.) was added dropwise. The mixture was warmed to room temperature and stirred for 30 minutes, after which the organic layer was separated, washed with water, and concentrated. The crude product was purified by column chromatography.

**Phenyl triflate (2c).** Synthesised from phenol (2.0 g, 21.3 mmol) following general procedure B. Isolated as a colourless oil (2.89 g, 61%).

**<sup>1</sup>H NMR** (400 MHz, CDCl<sub>3</sub>): δ 7.49-7.44 (m, 2H), 7.42-7.37 (m, 1H), 7.30-7.27 (m, 2H).

**<sup>13</sup>C{<sup>1</sup>H} NMR** (101 MHz, CDCl<sub>3</sub>): δ 149.8, 130.4, 128.5, 121.5, 118.9 (d, *J*<sub>CF</sub> = 320.6 Hz).

**<sup>19</sup>F{<sup>1</sup>H} NMR** (376 MHz, CDCl<sub>3</sub>): δ -72.9 (s, 3F, CF<sub>3</sub>).

NMR data are consistent with literature data.<sup>8</sup>

**3-Pyridinyl triflate (2d).** Synthesised from 3-hydroxypyridine (1.0 g, 10.5 mmol) following general procedure B. Isolated as a pale-yellow oil (1.22 g, 50%).

**<sup>1</sup>H NMR** (400 MHz, CDCl<sub>3</sub>): δ 8.66 (dd, *J*<sub>HH</sub> = 4.8, 1.4 Hz, 1H), 8.62 (d, *J*<sub>HH</sub> = 2.8 Hz, 1H), 7.65 (ddd, *J*<sub>HH</sub> = 8.4, 2.8, 1.4 Hz, 1H), 7.44 (ddd, *J*<sub>HH</sub> = 8.4, 4.8, 0.8 Hz, 1H).

**<sup>13</sup>C{<sup>1</sup>H} NMR** (101 MHz, CDCl<sub>3</sub>): δ 149.6, 146.8, 142.9, 129.0, 124.7, 118.7 (q, *J*<sub>CF</sub> = 321.2 Hz).

**<sup>19</sup>F{<sup>1</sup>H} NMR** (376 MHz, CDCl<sub>3</sub>): δ -72.5 (s, 3F, CF<sub>3</sub>).

NMR data are consistent with literature data.<sup>9</sup>

### 1.2.3 Other Electrophiles

**Phenyl tosylate (9).** Phenol (0.94 g, 10 mmol) was added to a mixture of dichloromethane (3 mL) and  $\text{NEt}_3$  (3 mL), and *p*-toluenesulfonyl chloride (1.91 g, 10 mmol) was added. The mixture was stirred for 16 h, after which it was treated with water (5 mL) and extracted with dichloromethane (3 x 5 mL). The organic extracts were combined, washed with brine, and dried over  $\text{MgSO}_4$ . The crude solution was concentrated and purified by column chromatography to give a white solid (2.03 g, 82%).

$^1\text{H NMR}$  (400 MHz,  $\text{CDCl}_3$ ):  $\delta$  7.72-7.69 (m, 2H), 7.32-7.21 (m, 5H), 7.00-6.96 (m, 2H), 2.45 (s, 3H)

$^{13}\text{C}\{^1\text{H}\}$  NMR (101 MHz,  $\text{CDCl}_3$ ):  $\delta$  149.8, 145.4, 132.6, 129.9, 129.7, 128.7, 127.2, 122.5, 21.9

NMR data are consistent with literature data.<sup>10</sup>

### 1.2.4 Reaction Products

**[1,1'-Bi(cyclopentane)]-1,1'-diene.** Prepared according to a literature procedure.<sup>11</sup> Phosphorus oxychloride (1.2 mL, 12.9 mmol) was added to a solution of 1,1'-bicyclopentyl-1,1'-diol (1 g, 5.9 mmol) in pyridine (10 mL) in a flask equipped with an internal thermometer. The reaction was heated to 70 °C, and then an ice bath was used to maintain the temperature at 90 °C until the initial exotherm had subsided. The reaction was then heated to 90 °C for 2 h, cooled to room temperature, poured into pentane (20 mL), and stirred. The pentane was decanted and the solid residue was quenched with HCl (50 mL of a 1 mol/L aqueous solution). This solution was then extracted with pentane (2x 20 mL), and the organic fractions were combined and washed with 1 mol/L aqueous HCl (50 mL). The organic fraction was then dried over magnesium sulfate, filtered through a silica plug, and concentrated to give the product as a yellow oil (0.3 g, 38%).

$^1\text{H NMR}$  (400 MHz,  $\text{CDCl}_3$ ):  $\delta$  5.61 (s, 2H), 2.53 - 2.43 (m, 8H), 1.94 (app. pent.,  $J_{\text{HH}} = 7.7$ , 2H).

$^{13}\text{C}\{^1\text{H}\}$  NMR (101 MHz,  $\text{CDCl}_3$ ):  $\delta$  139.9, 126.1, 32.5, 32.4, 22.9.

**GC-MS** (EI) *m/z*: 134.2.

NMR data are consistent with the literature.<sup>11</sup>

**4-(Trifluoromethyl)-1,1'-biphenyl.** A microwave vial was charged with  $[\text{PdCl}_2(\text{dppf})]\cdot\text{CH}_2\text{Cl}_2$  (171 mg, 0.21 mmol), phenylboronic acid (293 mg, 2.4 mmol), and potassium phosphate (1.3 g, 6.3 mmol). The vial was capped and then evacuated and backfilled with nitrogen three times. A degassed 4/1 v/v THF/water solution was added, followed by 4-bromobenzotrifluoride (0.3 mL, 2.1 mmol). The reaction was stirred at 85 °C for 6 h. After the reaction had cooled to room temperature, the reaction was filtered through a pad of celite and the solvent was removed under reduced pressure. The crude product was purified *via* column chromatography on silica gel to give the product as a white solid (0.3 g, 65%).

**$^1\text{H NMR}$**  (400 MHz,  $\text{CDCl}_3$ ):  $\delta$  7.72 (app. s, 4H), 7.64 - 7.62 (m, 2H), 7.52 - 7.41 (m, 3H).

**$^{19}\text{F}\{^1\text{H}\}$  NMR** (376 MHz,  $\text{CDCl}_3$ ):  $\delta$  -62.4.

**GC-MS** (EI) m/z: 222.2.

NMR data are consistent with the literature.<sup>12</sup>

## 2 Kinetic Studies

### 2.1 Methodology

The decrease in the concentration of [Ni(COD)(dppf)] (**1**) over time was monitored by NMR spectroscopy. A stock sample of [Ni(COD)(dppf)] (30 mg, 0.04 mmol) in C<sub>6</sub>D<sub>6</sub> (6 mL) was prepared in the glovebox and charged to septum-fitted NMR tubes in 0.5 mL portions.

Using this sample, the spectrometer was matched, tuned, locked, and shimmed, and the receiver gain was set. A spectrum was taken at this time to check the integrity of the sample and represents the integration at this point ( $t = 0$ ). For the kinetic experiment, the substrate being tested was added to the sample *via* syringe, the time was noted, and the sample was placed back into the NMR spectrometer.

To track the progress of the reaction, <sup>31</sup>P{<sup>1</sup>H} NMR spectra (16 scans per spectra, 2-second pulse delay) were taken at 100-second intervals until at least three half-lives of the sample were reached (~85% conversion).

All experiments were performed in duplicate. For substrates where ln(A) vs time gave a linear plot, the rate constant could be obtained from the gradient of the line.

### 2.2 Kinetic Data

Data are provided as integral vs time profiles for the integral of the signal corresponding to [Ni(COD)(dppf)] (**1**), scaled to the integral of the signal in the first spectrum, which is set to 1.0.

#### 2.2.1 Phenyl triflate (**2b**)

**Table S1.** Kinetic data for the reaction of phenyl triflate (**2b**) (0.14 mol L<sup>-1</sup>) with [Ni(COD)(dppf)] (**1**) (0.007 mol L<sup>-1</sup>) at 323 K.

| Replicate 1 |          | Replicate 2 |          |
|-------------|----------|-------------|----------|
| Time (s)    | Integral | Time (s)    | Integral |
| 0           | 1.000    | 0           | 1.000    |
| 76          | 0.931    | 85          | 0.899    |
| 214         | 0.917    | 232         | 0.906    |
| 351         | 0.916    | 380         | 0.850    |
| 488         | 0.844    | 527         | 0.846    |
| 626         | 0.801    | 674         | 0.811    |
| 763         | 0.765    | 822         | 0.770    |
| 900         | 0.753    | 969         | 0.752    |
| 1037        | 0.722    | 1116        | 0.729    |
| 1174        | 0.686    | 1264        | 0.705    |
| 1311        | 0.645    | 1411        | 0.679    |
| 1448        | 0.626    | 1558        | 0.652    |
| 1586        | 0.592    | 1705        | 0.608    |
| 1723        | 0.557    | 1852        | 0.624    |

|      |       |      |       |
|------|-------|------|-------|
| 1860 | 0.551 | 2000 | 0.579 |
| 1998 | 0.511 | 2147 | 0.538 |
| 2135 | 0.484 | 2294 | 0.532 |
| 2272 | 0.465 | 2441 | 0.503 |
| 2409 | 0.465 | 2589 | 0.489 |
| 2546 | 0.411 | 2736 | 0.477 |
| 2684 | 0.427 | 2884 | 0.442 |
| 2821 | 0.400 | 3031 | 0.437 |
| 2958 | 0.380 | 3178 | 0.431 |
| 3095 | 0.350 | 3325 | 0.397 |
| 3233 | 0.348 | 3473 | 0.359 |
| 3370 | 0.339 | 3620 | 0.353 |
| 3507 | 0.331 | 3767 | 0.344 |
| 3645 | 0.306 | 3914 | 0.327 |
| 3782 | 0.274 | 4062 | 0.335 |
| 3919 | 0.278 | 4209 | 0.324 |
| 4057 | 0.281 | 4356 | 0.297 |
| 4194 | 0.265 | 4504 | 0.272 |
| 4332 | 0.239 | 4651 | 0.266 |
| 4469 | 0.252 | 4798 | 0.254 |
| 4606 | 0.221 | 4946 | 0.272 |
| 4744 | 0.235 | 5093 | 0.235 |
| 4881 | 0.200 | 5240 | 0.226 |
| 5018 | 0.215 | 5387 | 0.229 |
| 5156 | 0.215 | 5535 | 0.213 |
| 5293 | 0.198 | 5682 | 0.204 |
| 5430 | 0.172 | 5829 | 0.214 |
| 5567 | 0.185 | 5977 | 0.159 |
| 5705 | 0.179 | 6124 | 0.194 |
| 5842 | 0.170 | 6271 | 0.176 |
| 5980 | 0.142 | 6418 | 0.160 |
| 6117 | 0.150 | 6566 | 0.152 |
| 6255 | 0.155 | 6713 | 0.133 |
| 6392 | 0.147 | 6860 | 0.157 |
| 6529 | 0.132 | 7008 | 0.129 |
| 6666 | 0.158 | 7155 | 0.124 |
| 6803 | 0.138 | 7303 | 0.107 |
| 6941 | 0.129 | 7450 | 0.119 |
| 7078 | 0.109 | 7597 | 0.100 |
| 7216 | 0.135 |      |       |

### 2.2.3 Chlorobenzene (8)

**Table S2.** Kinetic data for the reaction of chlorobenzene (**8**) (0.14 mol L<sup>-1</sup>) with [Ni(COD)(dppf)] (**1**) (0.007 mol L<sup>-1</sup>) at 323 K.

| Replicate 1 |          | Replicate 2 |          |
|-------------|----------|-------------|----------|
| Time (s)    | Integral | Time (s)    | Integral |
| 0           | 1.000    | 0           | 1.000    |
| 139         | 0.947    | 99          | 0.938    |
| 296         | 0.947    | 255         | 0.936    |
| 452         | 0.928    | 411         | 0.933    |
| 608         | 0.915    | 567         | 0.924    |
| 764         | 0.899    | 723         | 0.904    |
| 920         | 0.878    | 878         | 0.890    |
| 1075        | 0.866    | 1034        | 0.875    |
| 1232        | 0.829    | 1189        | 0.858    |
| 1388        | 0.823    | 1345        | 0.852    |
| 1544        | 0.805    | 1501        | 0.836    |
| 1699        | 0.777    | 1657        | 0.819    |
| 1855        | 0.763    | 1813        | 0.788    |
| 2011        | 0.747    | 1968        | 0.786    |
| 2168        | 0.740    | 2124        | 0.766    |
| 2324        | 0.717    | 2280        | 0.748    |
| 2481        | 0.702    | 2436        | 0.738    |
| 2637        | 0.684    | 2591        | 0.704    |
| 2793        | 0.675    | 2747        | 0.698    |
| 2948        | 0.658    | 2902        | 0.679    |
| 3105        | 0.643    | 3058        | 0.666    |
| 3261        | 0.622    | 3213        | 0.648    |
| 3417        | 0.615    | 3369        | 0.625    |
| 3573        | 0.604    | 3525        | 0.613    |
| 3729        | 0.584    | 3681        | 0.591    |
| 3884        | 0.572    | 3836        | 0.595    |
| 4041        | 0.563    | 3992        | 0.573    |
| 4197        | 0.532    | 4148        | 0.559    |
| 4353        | 0.528    | 4304        | 0.550    |
| 4508        | 0.512    | 4459        | 0.541    |
| 4664        | 0.514    | 4615        | 0.521    |
| 4821        | 0.494    | 4770        | 0.519    |
| 4977        | 0.480    | 4926        | 0.502    |
| 5133        | 0.469    | 5082        | 0.487    |
| 5289        | 0.454    | 5238        | 0.486    |
| 5444        | 0.444    | 5393        | 0.466    |
| 5600        | 0.440    | 5549        | 0.461    |
| 5757        | 0.437    | 5704        | 0.444    |
| 5913        | 0.421    | 5860        | 0.439    |

|       |       |       |       |
|-------|-------|-------|-------|
| 6068  | 0.400 | 6016  | 0.440 |
| 6224  | 0.406 | 6172  | 0.430 |
| 6380  | 0.393 | 6327  | 0.414 |
| 6536  | 0.387 | 6483  | 0.415 |
| 6693  | 0.367 | 6638  | 0.401 |
| 6849  | 0.366 | 6794  | 0.389 |
| 7005  | 0.369 | 6950  | 0.383 |
| 7161  | 0.355 | 7105  | 0.366 |
| 7317  | 0.342 | 7261  | 0.355 |
| 7473  | 0.339 | 7416  | 0.361 |
| 7629  | 0.336 | 7572  | 0.350 |
| 7785  | 0.333 | 7728  | 0.345 |
| 7941  | 0.310 | 7883  | 0.339 |
| 8097  | 0.310 | 8039  | 0.322 |
| 8253  | 0.290 | 8195  | 0.318 |
| 8409  | 0.288 | 8350  | 0.309 |
| 8565  | 0.287 | 8506  | 0.306 |
| 8722  | 0.289 | 8662  | 0.304 |
| 8878  | 0.269 | 8818  | 0.290 |
| 9033  | 0.260 | 8974  | 0.272 |
| 9189  | 0.271 | 9129  | 0.278 |
| 9345  | 0.255 | 9285  | 0.262 |
| 9502  | 0.244 | 9440  | 0.241 |
| 9657  | 0.226 | 9596  | 0.248 |
| 9813  | 0.241 | 9752  | 0.239 |
| 9969  | 0.221 | 9907  | 0.239 |
| 10125 | 0.227 | 10063 | 0.234 |
| 10281 | 0.218 | 10218 | 0.225 |
| 10437 | 0.209 | 10373 | 0.223 |
| 10593 | 0.207 | 10529 | 0.215 |
| 10749 | 0.208 | 10685 | 0.208 |
| 10905 | 0.191 | 10841 | 0.193 |
| 11060 | 0.179 | 10996 | 0.194 |
| 11217 | 0.192 | 11152 | 0.175 |
| 11373 | 0.179 | 11307 | 0.173 |
| 11529 | 0.170 | 11463 | 0.182 |
| 11685 | 0.175 | 11619 | 0.173 |
| 11841 | 0.157 | 11774 | 0.165 |
| 11996 | 0.161 | 11930 | 0.175 |
| 12153 | 0.149 |       |       |
| 12309 | 0.152 |       |       |

## 2.2.4 Phenyl tosylate (9)

**Table S3.** Kinetic data for the reaction of phenyl tosylate (9) (0.14 mol L<sup>-1</sup>) with [Ni(COD)(dppf)] (1) (0.007 mol L<sup>-1</sup>) at 323 K.

| Replicate 1 |          | Replicate 2 |          |
|-------------|----------|-------------|----------|
| Time (s)    | Integral | Time (s)    | Integral |
| 116         | 1.000    | 115         | 1.000    |
| 271         | 0.969    | 270         | 1.001    |
| 427         | 0.975    | 426         | 0.969    |
| 582         | 0.933    | 581         | 0.928    |
| 737         | 0.928    | 737         | 0.904    |
| 892         | 0.905    | 892         | 0.914    |
| 1047        | 0.863    | 1048        | 0.897    |
| 1203        | 0.855    | 1203        | 0.863    |
| 1358        | 0.829    | 1358        | 0.842    |
| 1513        | 0.812    | 1514        | 0.813    |
| 1669        | 0.768    | 1669        | 0.793    |
| 1824        | 0.759    | 1825        | 0.777    |
| 1979        | 0.743    | 1980        | 0.779    |
| 2135        | 0.707    | 2135        | 0.772    |
| 2290        | 0.720    | 2291        | 0.724    |
| 2446        | 0.666    | 2446        | 0.702    |
| 2601        | 0.672    | 2602        | 0.678    |
| 2756        | 0.648    | 2757        | 0.676    |
| 2911        | 0.647    | 2912        | 0.636    |
| 3066        | 0.638    | 3068        | 0.627    |
| 3222        | 0.611    | 3223        | 0.645    |
| 3377        | 0.607    | 3379        | 0.612    |
| 3532        | 0.569    | 3534        | 0.590    |
| 3688        | 0.554    | 3690        | 0.580    |
| 3843        | 0.550    | 3845        | 0.584    |
| 3998        | 0.540    | 4000        | 0.575    |
| 4153        | 0.531    | 4156        | 0.521    |
| 4308        | 0.522    | 4311        | 0.526    |
| 4464        | 0.505    | 4467        | 0.521    |
| 4619        | 0.483    | 4622        | 0.502    |
| 4774        | 0.482    | 4778        | 0.500    |
| 4930        | 0.474    | 4933        | 0.480    |
| 5086        | 0.462    | 5089        | 0.476    |
| 5241        | 0.446    | 5244        | 0.466    |
| 5396        | 0.444    | 5400        | 0.442    |
| 5551        | 0.436    | 5555        | 0.447    |
| 5707        | 0.435    | 5710        | 0.465    |
| 5862        | 0.424    | 5866        | 0.433    |
| 6017        | 0.415    | 6021        | 0.428    |

|       |       |       |       |
|-------|-------|-------|-------|
| 6173  | 0.419 | 6177  | 0.398 |
| 6328  | 0.396 | 6333  | 0.421 |
| 6483  | 0.381 | 6488  | 0.394 |
| 6639  | 0.341 | 6644  | 0.397 |
| 6795  | 0.368 | 6799  | 0.386 |
| 6950  | 0.356 | 6954  | 0.381 |
| 7106  | 0.352 | 7110  | 0.390 |
| 7261  | 0.376 | 7266  | 0.372 |
| 7416  | 0.340 | 7421  | 0.349 |
| 7572  | 0.343 | 7576  | 0.359 |
| 7727  | 0.333 | 7732  | 0.351 |
| 7882  | 0.326 | 7887  | 0.333 |
| 8038  | 0.318 | 8043  | 0.322 |
| 8193  | 0.321 | 8198  | 0.343 |
| 8348  | 0.307 | 8353  | 0.320 |
| 8504  | 0.302 | 8509  | 0.317 |
| 8659  | 0.271 | 8664  | 0.316 |
| 8815  | 0.300 | 8819  | 0.297 |
| 8970  | 0.296 | 8975  | 0.313 |
| 9125  | 0.293 | 9131  | 0.283 |
| 9280  | 0.297 | 9286  | 0.284 |
| 9436  | 0.270 | 9442  | 0.287 |
| 9591  | 0.266 | 9598  | 0.293 |
| 9747  | 0.262 | 9753  | 0.259 |
| 9902  | 0.258 | 9909  | 0.264 |
| 10057 | 0.243 | 10064 | 0.286 |
| 10213 | 0.248 | 10220 | 0.260 |
| 10368 | 0.245 | 10375 | 0.256 |
| 10524 | 0.224 | 10531 | 0.241 |
| 10679 | 0.228 | 10687 | 0.245 |
| 10834 | 0.236 | 10842 | 0.248 |
| 10989 | 0.237 | 10997 | 0.231 |
| 11145 | 0.231 | 11153 | 0.226 |
| 11300 | 0.222 | 11308 | 0.228 |
| 11455 | 0.211 | 11464 | 0.227 |
| 11611 | 0.224 | 11620 | 0.229 |
| 11766 | 0.204 | 11775 | 0.205 |
| 11921 | 0.195 | 11931 | 0.220 |
| 12077 | 0.208 | 12086 | 0.202 |
| 12232 | 0.200 | 12241 | 0.204 |
|       |       | 12397 | 0.209 |
|       |       | 12552 | 0.196 |
|       |       | 12708 | 0.192 |
|       |       | 12863 | 0.186 |
|       |       | 13019 | 0.173 |
|       |       | 13174 | 0.158 |

|  |  |       |       |
|--|--|-------|-------|
|  |  | 13329 | 0.167 |
|  |  | 13485 | 0.183 |
|  |  | 13641 | 0.160 |
|  |  | 13796 | 0.155 |
|  |  | 13951 | 0.150 |
|  |  | 14107 | 0.165 |
|  |  | 14262 | 0.161 |
|  |  | 14418 | 0.143 |
|  |  | 14574 | 0.135 |

### 2.2.5 2-Pyridinyl triflate (2b)

**Table S4.** Kinetic data for the reaction of 2-pyridinyl triflate (**2b**) (0.14 mol L<sup>-1</sup>) with [Ni(COD)(dppf)] (**1**) (0.007 mol L<sup>-1</sup>) at 293 K.

| Replicate 1 |          | Replicate 2 |          |
|-------------|----------|-------------|----------|
| Time (s)    | Integral | Time (s)    | Integral |
| 0           | 1.000    | 0           | 1.000    |
| 81          | 0.931    | 84          | 0.998    |
| 218         | 0.912    | 221         | 0.994    |
| 355         | 0.913    | 358         | 0.957    |
| 493         | 0.867    | 495         | 0.927    |
| 630         | 0.847    | 633         | 0.904    |
| 767         | 0.822    | 770         | 0.852    |
| 904         | 0.776    | 907         | 0.835    |
| 1042        | 0.750    | 1044        | 0.802    |
| 1179        | 0.731    | 1182        | 0.766    |
| 1316        | 0.694    | 1319        | 0.720    |
| 1453        | 0.650    | 1457        | 0.689    |
| 1590        | 0.628    | 1594        | 0.648    |
| 1728        | 0.600    | 1731        | 0.617    |
| 1865        | 0.574    | 1868        | 0.574    |
| 2002        | 0.522    | 2005        | 0.545    |
| 2139        | 0.499    | 2143        | 0.486    |
| 2277        | 0.444    | 2280        | 0.433    |
| 2414        | 0.417    | 2417        | 0.390    |
| 2551        | 0.378    | 2554        | 0.368    |
| 2688        | 0.344    | 2691        | 0.325    |
| 2825        | 0.307    | 2829        | 0.272    |
| 2962        | 0.280    | 2966        | 0.238    |
| 3100        | 0.257    | 3103        | 0.202    |
| 3237        | 0.227    | 3240        | 0.168    |
| 3374        | 0.190    | 3378        | 0.153    |
| 3511        | 0.168    | 3515        | 0.126    |
| 3648        | 0.147    | 3652        | 0.120    |
| 3786        | 0.121    |             |          |
| 3923        | 0.102    |             |          |

**Table S5.** Kinetic data for the reaction of 2-pyridinyl triflate (**2b**) (0.14 mol L<sup>-1</sup>) with [Ni(COD)(dppf)] (**1**) (0.0035 mol L<sup>-1</sup>) at 293 K.

| Time (s) | Integral |
|----------|----------|
| 0        | 1.000    |
| 87       | 0.799    |
| 224      | 0.800    |
| 361      | 0.799    |
| 499      | 0.777    |

|      |       |
|------|-------|
| 636  | 0.768 |
| 773  | 0.766 |
| 910  | 0.776 |
| 1047 | 0.748 |
| 1185 | 0.729 |
| 1322 | 0.728 |
| 1459 | 0.725 |
| 1596 | 0.699 |
| 1734 | 0.680 |
| 1871 | 0.672 |
| 2008 | 0.660 |
| 2145 | 0.635 |
| 2282 | 0.628 |
| 2419 | 0.596 |
| 2556 | 0.583 |
| 2693 | 0.560 |
| 2831 | 0.559 |
| 2968 | 0.520 |
| 3105 | 0.498 |
| 3242 | 0.475 |
| 3379 | 0.432 |
| 3517 | 0.424 |
| 3654 | 0.390 |
| 3791 | 0.364 |
| 3928 | 0.330 |
| 4065 | 0.314 |
| 4203 | 0.267 |
| 4340 | 0.220 |
| 4477 | 0.220 |
| 4615 | 0.188 |
| 4752 | 0.167 |
| 4889 | 0.169 |
| 5026 | 0.135 |
| 5164 | 0.118 |
| 5301 | 0.079 |
| 5438 | 0.102 |
| 5575 | 0.077 |

**Table S6.** Kinetic data for the reaction of 2-pyridinyl triflate (**zb**) ( $0.07 \text{ mol L}^{-1}$ ) with  $[\text{Ni}(\text{COD})(\text{dppf})]$  (**1**) ( $0.007 \text{ mol L}^{-1}$ ) at 293 K.

| Time (s) | Integral |
|----------|----------|
| 0        | 1.000    |
| 77       | 0.980    |
| 214      | 0.942    |
| 352      | 0.968    |
| 489      | 0.952    |

|      |       |
|------|-------|
| 626  | 0.908 |
| 763  | 0.875 |
| 901  | 0.841 |
| 1038 | 0.823 |
| 1175 | 0.787 |
| 1313 | 0.747 |
| 1450 | 0.744 |
| 1587 | 0.708 |
| 1725 | 0.690 |
| 1862 | 0.648 |
| 1999 | 0.620 |
| 2136 | 0.592 |
| 2273 | 0.549 |
| 2411 | 0.521 |
| 2548 | 0.488 |
| 2685 | 0.445 |
| 2823 | 0.407 |
| 2960 | 0.370 |
| 3097 | 0.349 |
| 3235 | 0.315 |
| 3372 | 0.286 |
| 3509 | 0.247 |
| 3647 | 0.236 |
| 3784 | 0.222 |
| 3921 | 0.178 |
| 4059 | 0.155 |
| 4196 | 0.140 |
| 4333 | 0.135 |
| 4471 | 0.109 |
| 4608 | 0.091 |

**Table S7.** Kinetic data for the reaction of 2-pyridinyl triflate (**zb**) (0.035 mol L<sup>-1</sup>) with [Ni(COD)(dppf)] (**1**) (0.007 mol L<sup>-1</sup>) at 293 K.

| Time (s) | Integral |
|----------|----------|
| 0        | 1.000    |
| 72       | 0.952    |
| 209      | 0.962    |
| 346      | 0.962    |
| 484      | 0.944    |
| 621      | 0.946    |
| 758      | 0.919    |
| 896      | 0.905    |
| 1033     | 0.889    |
| 1171     | 0.879    |
| 1308     | 0.852    |
| 1445     | 0.834    |

|      |       |
|------|-------|
| 1583 | 0.813 |
| 1720 | 0.798 |
| 1857 | 0.780 |
| 1995 | 0.747 |
| 2132 | 0.733 |
| 2269 | 0.703 |
| 2406 | 0.680 |
| 2543 | 0.641 |
| 2681 | 0.644 |
| 2818 | 0.607 |
| 2955 | 0.562 |
| 3093 | 0.554 |
| 3230 | 0.512 |
| 3367 | 0.472 |
| 3505 | 0.456 |
| 3642 | 0.429 |
| 3779 | 0.378 |
| 3917 | 0.366 |
| 4054 | 0.345 |
| 4191 | 0.322 |
| 4328 | 0.296 |
| 4465 | 0.268 |
| 4602 | 0.247 |
| 4740 | 0.236 |
| 4877 | 0.214 |
| 5015 | 0.193 |
| 5152 | 0.178 |
| 5289 | 0.167 |
| 5426 | 0.156 |
| 5563 | 0.150 |
| 5700 | 0.123 |
| 5837 | 0.107 |
| 5974 | 0.101 |
| 6111 | 0.095 |

### 2.2.6 3-Pyridinyl triflate (2d)

**Table S8.** Kinetic data for the reaction of 3-pyridinyl triflate (**2d**) (0.14 mol L<sup>-1</sup>) with [Ni(COD)(dppf)] (**1**) (0.007 mol L<sup>-1</sup>) at 293 K.

| Replicate 1 |          | Replicate 2 |          |
|-------------|----------|-------------|----------|
| Time (s)    | Integral | Time (s)    | Integral |
| 0           | 1.000    | 0           | 1.000    |
| 121         | 0.738    | 73          | 0.824    |
| 175         | 0.639    | 133         | 0.737    |
| 228         | 0.534    | 186         | 0.640    |
| 282         | 0.455    | 239         | 0.542    |
| 335         | 0.375    | 292         | 0.446    |
| 389         | 0.304    | 345         | 0.341    |
| 443         | 0.234    | 398         | 0.282    |
| 496         | 0.188    | 451         | 0.227    |
| 550         | 0.148    | 503         | 0.179    |
| 603         | 0.116    | 557         | 0.142    |
| 657         | 0.082    | 609         | 0.116    |
|             |          | 662         | 0.092    |

### 2.2.7 Cyclopent-1-en-1-yl triflate (**5a**)

**Table S9.** Kinetic data for the reaction of cyclopent-1-en-1-yl triflate (**5a**) (0.14 mol L<sup>-1</sup>) with [Ni(COD)(dppf)] (**1**) (0.007 mol L<sup>-1</sup>) at 323 K.

| Replicate 1 |          | Replicate 2 |          |
|-------------|----------|-------------|----------|
| Time (s)    | Integral | Time (s)    | Integral |
| 0           | 1.000    | 0           | 1.000    |
| 103         | 0.918    | 54          | 0.773    |
| 250         | 0.867    | 201         | 0.868    |
| 381         | 0.808    | 348         | 0.750    |
| 497         | 0.736    | 496         | 0.703    |
| 629         | 0.678    | 643         | 0.676    |
| 745         | 0.648    | 790         | 0.558    |
| 876         | 0.614    | 937         | 0.551    |
| 992         | 0.595    | 1085        | 0.519    |
| 1123        | 0.553    | 1232        | 0.449    |
| 1239        | 0.508    | 1379        | 0.428    |
| 1371        | 0.468    | 1527        | 0.396    |
| 1487        | 0.435    | 1674        | 0.372    |
| 1618        | 0.423    | 1821        | 0.342    |
| 1734        | 0.389    | 1968        | 0.316    |
| 1865        | 0.353    | 2115        | 0.263    |
| 1981        | 0.333    | 2262        | 0.247    |
| 2112        | 0.259    | 2410        | 0.224    |
| 2228        | 0.231    | 2557        | 0.204    |
| 2359        | 0.231    | 2704        | 0.163    |
| 2475        | 0.227    | 2851        | 0.149    |
| 2606        | 0.183    |             |          |
| 2723        | 0.216    |             |          |
| 2854        | 0.205    |             |          |
| 2970        | 0.168    |             |          |
| 3101        | 0.162    |             |          |
| 3217        | 0.169    |             |          |
| 3348        | 0.134    |             |          |
| 3465        | 0.105    |             |          |

### 2.2.8 Cyclohex-1-en-1-yl triflate (5b)

**Table S10.** Kinetic data for the reaction of cyclohex-1-en-1-yl triflate (**5b**) (0.14 mol L<sup>-1</sup>) with [Ni(COD)(dppf)] (**1**) (0.007 mol L<sup>-1</sup>) at 333 K.

| Replicate 1 |          | Replicate 2 |          |
|-------------|----------|-------------|----------|
| Time (s)    | Integral | Time (s)    | Integral |
| 0           | 1.000    | 0           | 1.000    |
| 90          | 0.925    | 86          | 0.916    |
| 228         | 0.935    | 223         | 0.912    |
| 365         | 0.850    | 361         | 0.891    |
| 502         | 0.787    | 498         | 0.858    |
| 640         | 0.790    | 635         | 0.817    |
| 783         | 0.748    | 773         | 0.817    |
| 920         | 0.683    | 910         | 0.728    |
| 1057        | 0.636    | 1048        | 0.712    |
| 1195        | 0.604    | 1185        | 0.664    |
| 1332        | 0.551    | 1323        | 0.620    |
| 1469        | 0.522    | 1460        | 0.547    |
| 1606        | 0.460    | 1597        | 0.510    |
| 1743        | 0.426    | 1735        | 0.473    |
| 1881        | 0.357    | 1872        | 0.431    |
| 2018        | 0.315    | 2009        | 0.404    |
| 2155        | 0.271    | 2146        | 0.353    |
| 2293        | 0.237    | 2283        | 0.308    |
| 2430        | 0.213    | 2420        | 0.261    |
| 2568        | 0.154    | 2558        | 0.231    |
| 2705        | 0.134    | 2695        | 0.181    |
|             |          | 2832        | 0.155    |
|             |          | 2969        | 0.145    |
|             |          | 3107        | 0.118    |
|             |          | 3244        | 0.100    |

### 2.2.9 Cyclohept-1-en-1-yl triflate (5c)

**Table S11.** Kinetic data for the reaction of cyclohept-1-en-1-yl triflate (**5c**) (0.14 mol L<sup>-1</sup>) with [Ni(COD)(dppf)] (**1**) (0.007 mol L<sup>-1</sup>) at 323 K.

| Replicate 1 |          | Replicate 2 |          |
|-------------|----------|-------------|----------|
| Time (s)    | Integral | Time (s)    | Integral |
| 0           | 1.000    | 0           | 1.000    |
| 190         | 0.783    | 424         | 0.732    |
| 249         | 0.740    | 485         | 0.705    |
| 307         | 0.720    | 543         | 0.688    |
| 366         | 0.691    | 601         | 0.654    |
| 425         | 0.674    | 660         | 0.635    |
| 484         | 0.636    | 718         | 0.620    |
| 543         | 0.626    | 776         | 0.593    |
| 601         | 0.608    | 835         | 0.572    |
| 660         | 0.577    | 893         | 0.540    |
| 719         | 0.564    | 951         | 0.526    |
| 778         | 0.546    | 1010        | 0.509    |
| 837         | 0.532    | 1068        | 0.493    |
| 895         | 0.505    | 1127        | 0.477    |
| 954         | 0.484    | 1185        | 0.446    |
| 1013        | 0.466    | 1243        | 0.445    |
| 1072        | 0.449    | 1302        | 0.421    |
| 1131        | 0.445    | 1360        | 0.405    |
| 1189        | 0.417    | 1419        | 0.373    |
| 1248        | 0.403    | 1477        | 0.370    |
| 1306        | 0.392    | 1535        | 0.348    |
| 1365        | 0.361    | 1594        | 0.349    |
| 1424        | 0.360    | 1652        | 0.315    |
| 1483        | 0.350    | 1710        | 0.305    |
| 1542        | 0.338    | 1769        | 0.287    |
| 1601        | 0.321    | 1827        | 0.283    |
| 1659        | 0.293    | 1885        | 0.269    |
| 1718        | 0.291    | 1944        | 0.255    |
| 1777        | 0.272    | 2002        | 0.245    |
| 1836        | 0.269    | 2061        | 0.216    |
| 1894        | 0.253    | 2119        | 0.225    |
| 1953        | 0.247    | 2177        | 0.195    |
| 2012        | 0.231    | 2236        | 0.187    |
| 2071        | 0.208    | 2294        | 0.182    |
| 2130        | 0.206    | 2352        | 0.165    |
| 2188        | 0.194    | 2410        | 0.159    |
| 2247        | 0.177    | 2469        | 0.131    |
| 2306        | 0.172    | 2527        | 0.140    |
| 2365        | 0.157    | 2586        | 0.115    |

|      |       |      |       |
|------|-------|------|-------|
| 2424 | 0.144 | 2644 | 0.109 |
| 2482 | 0.134 |      |       |
| 2541 | 0.127 |      |       |
| 2600 | 0.115 |      |       |
| 2658 | 0.105 |      |       |

### 2.2.10 Cyclooct-1-en-1-yl triflate (**5d**)

**Table S12.** Kinetic data for the reaction of cyclooct-1-en-1-yl triflate (**5d**) (0.14 mol L<sup>-1</sup>) with [Ni(COD)(dppf)] (**1**) (0.007 mol L<sup>-1</sup>) at 323 K.

| Replicate 1 |          | Replicate 2 |          |
|-------------|----------|-------------|----------|
| Time (s)    | Integral | Time (s)    | Integral |
| 0           | 1.000    | 0           | 1.000    |
| 90          | 0.887    | 131         | 0.804    |
| 227         | 0.759    | 268         | 0.715    |
| 365         | 0.723    | 405         | 0.718    |
| 502         | 0.667    | 542         | 0.668    |
| 639         | 0.638    | 680         | 0.606    |
| 776         | 0.587    | 817         | 0.600    |
| 913         | 0.554    | 954         | 0.555    |
| 1050        | 0.584    | 1091        | 0.557    |
| 1188        | 0.499    | 1228        | 0.480    |
| 1325        | 0.517    | 1366        | 0.481    |
| 1462        | 0.445    | 1503        | 0.404    |
| 1599        | 0.422    | 1640        | 0.400    |
| 1736        | 0.381    | 1777        | 0.366    |
| 1874        | 0.339    | 1915        | 0.277    |
| 2011        | 0.307    | 2052        | 0.296    |
| 2148        | 0.304    | 2189        | 0.292    |
| 2285        | 0.306    | 2326        | 0.250    |
| 2422        | 0.247    | 2464        | 0.221    |
| 2559        | 0.223    | 2601        | 0.180    |
| 2972        | 0.154    | 2738        | 0.206    |

### 2.3 VTNA Treatment

**Methodology.** It was assumed that the weighing of [Ni(COD)(dppf)] (**1**) and 2-pyridinyl triflate (**2b**) were accurate, and that an integral of 1.000 corresponds to the initial charge of **1**, as determined by mass. This was then used to convert the integral corresponding to **1** into [1] in mol L<sup>-1</sup>. It was assumed that 1 equiv. of **1** reacts with 1 equiv. of substrate to produce 1 equiv. [Ni(OTf)(dppf)] **6** plus 0.5 equiv. 2,2'-bipyridine, and therefore that for every mole of **1** consumed, one mole of **2b** was consumed. This allows profiles of [1] and [2b] *versus* time to be constructed. The timescales for these profiles were then adjusted using VTNA methodology, so that for each time point *t*, a new timepoint *tT* was calculated, according to equation S1.

$$tT_n = tT_{n-1} + (\Delta[1]/2)^a \times (\Delta[2b]/2)^b \times (t_n - t_{n-1}) \quad (S1)$$

where  $\Delta[1]$  and  $\Delta[2b]$  are the changes in concentration of **1** and **2b** (respectively) during the time period between  $t_n$  and  $t_{n-1}$ , *a* is the order in **1**, and *b* is the order in **2b**.

This leads to a new profile, which qualitatively overlaps for each of the four experiments used for the VNTA treatment. In each case the concentration of **6** – assuming that one molecule of **1** forms one molecule of **6** – is plotted to allow ready comparison between experiments.

**Table S13.** Data for the VTNA treatment of the reaction of **1** (0.007 mol L<sup>-1</sup>) with **2b** (0.14 mol L<sup>-1</sup>) with an order of 0.9 in **1** and 0.3 in **2b**.

| Time (s) | Integral for 1 | [1] (mol L <sup>-1</sup> ) | [2b] (mol L <sup>-1</sup> ) | tT       | [6] (mol L <sup>-1</sup> ) |
|----------|----------------|----------------------------|-----------------------------|----------|----------------------------|
| 0        | 1              | 0.00694                    | 0.13884                     | 0        | 0                          |
| 81       | 0.93149        | 0.00646                    | 0.13836                     | 0.49501  | 0.000475                   |
| 218      | 0.91227        | 0.00633                    | 0.13823                     | 1.29742  | 0.000609                   |
| 355      | 0.9126         | 0.00633                    | 0.13823                     | 2.09231  | 0.000607                   |
| 493      | 0.86699        | 0.00602                    | 0.13792                     | 2.87484  | 0.000923                   |
| 630      | 0.84749        | 0.00588                    | 0.13778                     | 3.62569  | 0.00106                    |
| 767      | 0.82237        | 0.00571                    | 0.13761                     | 4.35869  | 0.00123                    |
| 904      | 0.77582        | 0.00538                    | 0.13728                     | 5.06293  | 0.00156                    |
| 1042     | 0.75018        | 0.00521                    | 0.13711                     | 5.74304  | 0.00173                    |
| 1179     | 0.73094        | 0.00507                    | 0.13697                     | 6.40009  | 0.00187                    |
| 1316     | 0.69418        | 0.00482                    | 0.13672                     | 7.03447  | 0.00212                    |
| 1453     | 0.64955        | 0.00451                    | 0.13641                     | 7.63578  | 0.00243                    |
| 1590     | 0.62802        | 0.00436                    | 0.13626                     | 8.21009  | 0.00258                    |
| 1728     | 0.59963        | 0.00416                    | 0.13606                     | 8.76799  | 0.00278                    |
| 1865     | 0.57374        | 0.00398                    | 0.13588                     | 9.29954  | 0.00296                    |
| 2002     | 0.52186        | 0.00362                    | 0.13552                     | 9.79898  | 0.00332                    |
| 2139     | 0.49929        | 0.00347                    | 0.13537                     | 10.2675  | 0.00347                    |
| 2277     | 0.44364        | 0.00308                    | 0.13498                     | 10.70651 | 0.00386                    |
| 2414     | 0.41677        | 0.00289                    | 0.13479                     | 11.1076  | 0.00405                    |
| 2551     | 0.3785         | 0.00263                    | 0.13453                     | 11.48107 | 0.00431                    |
| 2688     | 0.34387        | 0.00239                    | 0.13429                     | 11.82339 | 0.00455                    |

|      |         |          |         |          |         |
|------|---------|----------|---------|----------|---------|
| 2825 | 0.30693 | 0.00213  | 0.13403 | 12.13485 | 0.00481 |
| 2962 | 0.27967 | 0.00194  | 0.13384 | 12.41837 | 0.005   |
| 3100 | 0.25707 | 0.00178  | 0.13368 | 12.68192 | 0.00516 |
| 3237 | 0.22679 | 0.00157  | 0.13347 | 12.92014 | 0.00537 |
| 3374 | 0.19005 | 0.00132  | 0.13322 | 13.12835 | 0.00562 |
| 3511 | 0.16837 | 0.00117  | 0.13307 | 13.31001 | 0.00577 |
| 3648 | 0.14744 | 0.00102  | 0.13292 | 13.47206 | 0.00592 |
| 3786 | 0.12147 | 0.000843 | 0.13274 | 13.61326 | 0.0061  |
| 3923 | 0.10167 | 0.000706 | 0.13261 | 13.73172 | 0.00623 |

**Table S14.** Data for the VTNA treatment of the reaction of **1** (0.0035 mol L<sup>-1</sup>) with **2b** (0.14 mol L<sup>-1</sup>) with an order of 0.9 in **1** and 0.3 in **2b**.

| Time (s) | Integral for <b>1</b> | [ <b>1</b> ] (mol L <sup>-1</sup> ) | [ <b>2b</b> ] (mol L <sup>-1</sup> ) | tT      | [ <b>6</b> ] (mol L <sup>-1</sup> ) |
|----------|-----------------------|-------------------------------------|--------------------------------------|---------|-------------------------------------|
| 0        | 1                     | 0.00347                             | 0.13884                              | 0       | 0                                   |
| 87       | 0.79937               | 0.00277                             | 0.13814                              | 0.26725 | 0.000696                            |
| 224      | 0.80048               | 0.00278                             | 0.13815                              | 0.64558 | 0.000692                            |
| 361      | 0.79864               | 0.00277                             | 0.13814                              | 1.02375 | 0.000699                            |
| 499      | 0.77691               | 0.0027                              | 0.13807                              | 1.39958 | 0.000774                            |
| 636      | 0.76828               | 0.00267                             | 0.13804                              | 1.76618 | 0.000804                            |
| 773      | 0.76599               | 0.00266                             | 0.13803                              | 2.13042 | 0.000812                            |
| 910      | 0.77637               | 0.00269                             | 0.13806                              | 2.49641 | 0.000776                            |
| 1047     | 0.74752               | 0.00259                             | 0.13796                              | 2.85842 | 0.000876                            |
| 1185     | 0.72856               | 0.00253                             | 0.1379                               | 3.2127  | 0.000942                            |
| 1322     | 0.72781               | 0.00253                             | 0.1379                               | 3.56016 | 0.000944                            |
| 1459     | 0.72482               | 0.00252                             | 0.13789                              | 3.90681 | 0.000955                            |
| 1596     | 0.69892               | 0.00243                             | 0.1378                               | 4.24721 | 0.00104                             |
| 1734     | 0.67983               | 0.00236                             | 0.13773                              | 4.58027 | 0.00111                             |
| 1871     | 0.67226               | 0.00233                             | 0.1377                               | 4.90512 | 0.00114                             |
| 2008     | 0.66019               | 0.00229                             | 0.13766                              | 5.22571 | 0.00118                             |
| 2145     | 0.6346                | 0.0022                              | 0.13757                              | 5.53808 | 0.00127                             |
| 2282     | 0.62761               | 0.00218                             | 0.13755                              | 5.84332 | 0.00129                             |
| 2419     | 0.59572               | 0.00207                             | 0.13744                              | 6.14005 | 0.0014                              |
| 2556     | 0.58337               | 0.00202                             | 0.13739                              | 6.42706 | 0.00145                             |
| 2693     | 0.56008               | 0.00194                             | 0.13731                              | 6.70621 | 0.00153                             |
| 2831     | 0.55879               | 0.00194                             | 0.13731                              | 6.98193 | 0.00153                             |
| 2968     | 0.52044               | 0.00181                             | 0.13718                              | 7.24686 | 0.00166                             |
| 3105     | 0.49763               | 0.00173                             | 0.1371                               | 7.49819 | 0.00174                             |
| 3242     | 0.4754                | 0.00165                             | 0.13702                              | 7.73944 | 0.00182                             |
| 3379     | 0.43163               | 0.0015                              | 0.13687                              | 7.96586 | 0.00197                             |
| 3517     | 0.42359               | 0.00147                             | 0.13684                              | 8.18213 | 0.002                               |
| 3654     | 0.38966               | 0.00135                             | 0.13672                              | 8.3873  | 0.00212                             |
| 3791     | 0.36365               | 0.00126                             | 0.13663                              | 8.57876 | 0.00221                             |
| 3928     | 0.33036               | 0.00115                             | 0.13652                              | 8.75656 | 0.00232                             |
| 4065     | 0.3135                | 0.00109                             | 0.13646                              | 8.92272 | 0.00238                             |
| 4203     | 0.26664               | 0.000925                            | 0.1363                               | 9.07507 | 0.00254                             |
| 4340     | 0.21979               | 0.000763                            | 0.13613                              | 9.20409 | 0.00271                             |

|      |         |          |         |         |         |
|------|---------|----------|---------|---------|---------|
| 4477 | 0.22035 | 0.000765 | 0.13613 | 9.32199 | 0.00271 |
| 4615 | 0.18828 | 0.000653 | 0.13602 | 9.43306 | 0.00282 |
| 4752 | 0.16744 | 0.000581 | 0.13595 | 9.53036 | 0.00289 |
| 4889 | 0.16852 | 0.000585 | 0.13595 | 9.62278 | 0.00289 |
| 5026 | 0.13523 | 0.000469 | 0.13584 | 9.70718 | 0.003   |
| 5164 | 0.11779 | 0.000409 | 0.13578 | 9.77928 | 0.00306 |
| 5301 | 0.07932 | 0.000275 | 0.13565 | 9.83645 | 0.00319 |
| 5438 | 0.10177 | 0.000353 | 0.13572 | 9.88941 | 0.00312 |
| 5575 | 0.07688 | 0.000267 | 0.13564 | 9.94173 | 0.0032  |

**Table S15.** Data for the VTNA treatment of the reaction of **1** (0.007 mol L<sup>-1</sup>) with **2b** (0.07 mol L<sup>-1</sup>) with an order of 0.9 in **1** and 0.3 in **2b**.

| Time (s) | Integral for <b>1</b> | [ <b>1</b> ] (mol L <sup>-1</sup> ) | [ <b>2b</b> ] (mol L <sup>-1</sup> ) | tT       | [ <b>6</b> ] (mol L <sup>-1</sup> ) |
|----------|-----------------------|-------------------------------------|--------------------------------------|----------|-------------------------------------|
| 0        | 1                     | 0.00694                             | 0.0694                               | 0        | 0                                   |
| 77       | 0.98025               | 0.0068                              | 0.06926                              | 0.39094  | 0.000137                            |
| 214      | 0.94219               | 0.00654                             | 0.069                                | 1.06763  | 0.000401                            |
| 352      | 0.96823               | 0.00672                             | 0.06918                              | 1.7453   | 0.000220                            |
| 489      | 0.95158               | 0.0066                              | 0.06906                              | 2.42112  | 0.000336                            |
| 626      | 0.90779               | 0.0063                              | 0.06876                              | 3.07717  | 0.000640                            |
| 763      | 0.87466               | 0.00607                             | 0.06853                              | 3.708    | 0.000870                            |
| 901      | 0.84082               | 0.00584                             | 0.0683                               | 4.32129  | 0.0011                              |
| 1038     | 0.8231                | 0.00571                             | 0.06817                              | 4.91317  | 0.00123                             |
| 1175     | 0.78683               | 0.00546                             | 0.06792                              | 5.48727  | 0.00148                             |
| 1313     | 0.74744               | 0.00519                             | 0.06765                              | 6.0404   | 0.00175                             |
| 1450     | 0.74366               | 0.00516                             | 0.06762                              | 6.57524  | 0.00178                             |
| 1587     | 0.70789               | 0.00491                             | 0.06737                              | 7.09698  | 0.00203                             |
| 1725     | 0.69009               | 0.00479                             | 0.06725                              | 7.60461  | 0.00215                             |
| 1862     | 0.64826               | 0.0045                              | 0.06696                              | 8.08873  | 0.00244                             |
| 1999     | 0.61969               | 0.0043                              | 0.06676                              | 8.54937  | 0.00264                             |
| 2136     | 0.59202               | 0.00411                             | 0.06657                              | 8.99119  | 0.00283                             |
| 2273     | 0.54877               | 0.00381                             | 0.06627                              | 9.4092   | 0.00313                             |
| 2411     | 0.52067               | 0.00361                             | 0.06607                              | 9.80604  | 0.00333                             |
| 2548     | 0.48841               | 0.00339                             | 0.06585                              | 10.17958 | 0.00355                             |
| 2685     | 0.44454               | 0.00309                             | 0.06555                              | 10.52724 | 0.00385                             |
| 2823     | 0.40747               | 0.00283                             | 0.06529                              | 10.84956 | 0.00411                             |
| 2960     | 0.36951               | 0.00256                             | 0.06502                              | 11.14371 | 0.00438                             |
| 3097     | 0.34861               | 0.00242                             | 0.06488                              | 11.41747 | 0.00452                             |
| 3235     | 0.31505               | 0.00219                             | 0.06465                              | 11.67411 | 0.00475                             |
| 3372     | 0.28554               | 0.00198                             | 0.06444                              | 11.90675 | 0.00496                             |
| 3509     | 0.24719               | 0.00172                             | 0.06418                              | 12.11537 | 0.00522                             |
| 3647     | 0.2356                | 0.00164                             | 0.0641                               | 12.30755 | 0.0053                              |
| 3784     | 0.22212               | 0.00154                             | 0.064                                | 12.48931 | 0.0054                              |
| 3921     | 0.17812               | 0.00124                             | 0.0637                               | 12.65025 | 0.0057                              |
| 4059     | 0.15483               | 0.00107                             | 0.06353                              | 12.78746 | 0.00587                             |
| 4196     | 0.13989               | 0.000971                            | 0.06343                              | 12.90943 | 0.00597                             |

|      |         |          |         |          |         |
|------|---------|----------|---------|----------|---------|
| 4333 | 0.13463 | 0.000934 | 0.06339 | 13.02382 | 0.00601 |
| 4471 | 0.10918 | 0.000758 | 0.06322 | 13.12733 | 0.00618 |
| 4608 | 0.09101 | 0.000632 | 0.06309 | 13.21331 | 0.00631 |

**Table S16.** Data for the VTNA treatment of the reaction of **1** (0.007 mol L<sup>-1</sup>) with **2b** (0.035 mol L<sup>-1</sup>) with an order of 0.9 in **1** and 0.3 in **2b**.

| Time (s) | Integral for <b>1</b> | [ <b>1</b> ] (mol L <sup>-1</sup> ) | [ <b>2b</b> ] (mol L <sup>-1</sup> ) | tT       | [ <b>6</b> ] (mol L <sup>-1</sup> ) |
|----------|-----------------------|-------------------------------------|--------------------------------------|----------|-------------------------------------|
| 0        | 1                     | 0.00694                             | 0.0347                               | 0        | 0                                   |
| 72       | 0.95244               | 0.00661                             | 0.03437                              | 0.29284  | 0.000330                            |
| 209      | 0.96248               | 0.00668                             | 0.03444                              | 0.83978  | 0.000260                            |
| 346      | 0.9624                | 0.00668                             | 0.03444                              | 1.38944  | 0.000261                            |
| 484      | 0.94385               | 0.00655                             | 0.03431                              | 1.93798  | 0.000390                            |
| 621      | 0.94581               | 0.00656                             | 0.03432                              | 2.47801  | 0.000376                            |
| 758      | 0.91911               | 0.00638                             | 0.03414                              | 3.01127  | 0.000561                            |
| 896      | 0.90469               | 0.00628                             | 0.03404                              | 3.53709  | 0.000661                            |
| 1033     | 0.88914               | 0.00617                             | 0.03393                              | 4.0509   | 0.000769                            |
| 1171     | 0.87922               | 0.0061                              | 0.03386                              | 4.56145  | 0.000838                            |
| 1308     | 0.85192               | 0.00591                             | 0.03367                              | 5.05811  | 0.00103                             |
| 1445     | 0.8342                | 0.00579                             | 0.03355                              | 5.54246  | 0.00115                             |
| 1583     | 0.81284               | 0.00564                             | 0.0334                               | 6.01958  | 0.0013                              |
| 1720     | 0.79779               | 0.00554                             | 0.0333                               | 6.48328  | 0.0014                              |
| 1857     | 0.78042               | 0.00542                             | 0.03318                              | 6.93811  | 0.00152                             |
| 1995     | 0.7472                | 0.00519                             | 0.03295                              | 7.38232  | 0.00175                             |
| 2132     | 0.73289               | 0.00509                             | 0.03285                              | 7.8103   | 0.00185                             |
| 2269     | 0.70321               | 0.00488                             | 0.03264                              | 8.22623  | 0.00206                             |
| 2406     | 0.68046               | 0.00472                             | 0.03248                              | 8.62779  | 0.00222                             |
| 2543     | 0.64107               | 0.00445                             | 0.03221                              | 9.01232  | 0.00249                             |
| 2681     | 0.64431               | 0.00447                             | 0.03223                              | 9.38967  | 0.00247                             |
| 2818     | 0.60748               | 0.00422                             | 0.03198                              | 9.75506  | 0.00272                             |
| 2955     | 0.56198               | 0.0039                              | 0.03166                              | 10.09784 | 0.00304                             |
| 3093     | 0.55435               | 0.00385                             | 0.03161                              | 10.42838 | 0.00309                             |
| 3230     | 0.51188               | 0.00355                             | 0.03131                              | 10.74273 | 0.00339                             |
| 3367     | 0.47221               | 0.00328                             | 0.03104                              | 11.0344  | 0.00366                             |
| 3505     | 0.45603               | 0.00316                             | 0.03092                              | 11.31263 | 0.00378                             |
| 3642     | 0.42883               | 0.00298                             | 0.03074                              | 11.5768  | 0.00396                             |
| 3779     | 0.37764               | 0.00262                             | 0.03038                              | 11.81918 | 0.00432                             |
| 3917     | 0.36565               | 0.00254                             | 0.0303                               | 12.04555 | 0.0044                              |
| 4054     | 0.34451               | 0.00239                             | 0.03015                              | 12.26099 | 0.00455                             |
| 4191     | 0.32199               | 0.00223                             | 0.02999                              | 12.46418 | 0.00471                             |
| 4328     | 0.29582               | 0.00205                             | 0.02981                              | 12.65363 | 0.00489                             |
| 4465     | 0.26793               | 0.00186                             | 0.02962                              | 12.82777 | 0.00508                             |
| 4602     | 0.2465                | 0.00171                             | 0.02947                              | 12.98785 | 0.00523                             |
| 4740     | 0.23554               | 0.00163                             | 0.02939                              | 13.13977 | 0.00531                             |
| 4877     | 0.21437               | 0.00149                             | 0.02925                              | 13.28135 | 0.00545                             |
| 5015     | 0.19328               | 0.00134                             | 0.0291                               | 13.41164 | 0.0056                              |

|      |         |          |         |          |         |
|------|---------|----------|---------|----------|---------|
| 5152 | 0.17772 | 0.00123  | 0.02899 | 13.53033 | 0.00571 |
| 5289 | 0.16668 | 0.00116  | 0.02892 | 13.64122 | 0.00578 |
| 5426 | 0.15633 | 0.00108  | 0.02884 | 13.74581 | 0.00586 |
| 5563 | 0.15039 | 0.00104  | 0.0288  | 13.84558 | 0.0059  |
| 5700 | 0.12301 | 0.000854 | 0.02861 | 13.93543 | 0.00609 |
| 5837 | 0.10725 | 0.000744 | 0.0285  | 14.0123  | 0.0062  |
| 5974 | 0.1009  | 0.000700 | 0.02846 | 14.08243 | 0.00624 |
| 6111 | 0.09493 | 0.000659 | 0.02842 | 14.14879 | 0.00628 |

### 3 Measurement of Equilibrium Constants

#### 3.1 Methodology

Equilibrium constants were measured by  $^{31}\text{P}$  NMR spectroscopic analysis of a mixture of  $[\text{Ni}(\text{COD})(\text{dppf})]$  and the alkene of interest in benzene- $d_6$ , in the presence of  $\text{OPPh}_3$  as an internal standard. The integral of the internal standard was set to 1 and all other integrals were measured relative to this.

The equilibrium constant  $K_{eq}$  can be defined as per eq. S1.

$$K_{eq} = \frac{[\text{Ni}(\text{alkene})(\text{dppf})] \cdot [\text{COD}]}{[\text{Ni}(\text{COD})(\text{dppf})] \cdot [\text{alkene}]} \quad (\text{S1})$$

The concentration of COD cannot be measured by  $^{31}\text{P}$  NMR spectroscopy but will be equal to the concentration of  $[\text{Ni}(\text{alkene})(\text{dppf})]$ . Likewise, the concentration of alkene will be equal to the initial concentration of alkene minus the concentration of  $[\text{Ni}(\text{alkene})(\text{dppf})]$ . Therefore, we can derive eq. S2.

$$K_{eq} = \frac{[\text{Ni}(\text{alkene})(\text{dppf})]^2}{[\text{Ni}(\text{COD})(\text{dppf})] \cdot ([\text{alkene}]_0 - [\text{Ni}(\text{alkene})(\text{dppf})])} \quad (\text{S2})$$

This allows the equilibrium constant to be measured provided that the concentrations of  $[\text{Ni}(\text{alkene})(\text{dppf})]$  and  $[\text{Ni}(\text{COD})(\text{dppf})]$  are known – although in theory the latter might be calculated from the former – provided the initial concentration of alkene is known.

#### 3.2 Equilibrium Constants

| Alkene          | $[\text{OPPh}_3]$<br>mol L <sup>-1</sup> | $[\text{Ni}(\text{COD})(\text{dppf})]$<br>Integral | $[\text{Ni}(\text{alkene})(\text{dppf})]$<br>Integral | $[\text{Alkene}]_0$<br>mol L <sup>-1</sup> | $[\text{Ni}(\text{COD})(\text{dppf})]$<br>mol L <sup>-1</sup> | $[\text{Ni}(\text{alkene})(\text{dppf})]$<br>mol L <sup>-1</sup> | $K_{eq}$             |
|-----------------|------------------------------------------|----------------------------------------------------|-------------------------------------------------------|--------------------------------------------|---------------------------------------------------------------|------------------------------------------------------------------|----------------------|
| Cyclopentene    | 0.022                                    | 2.734                                              | 0.338                                                 | 0.022                                      | 0.030                                                         | 0.0037                                                           | $2.5 \times 10^{-2}$ |
| Cyclohexene     |                                          | 2.517                                              | 0                                                     |                                            | 0.028                                                         | 0                                                                | 0                    |
| Cycloheptene    |                                          | 2.490                                              | 0.163                                                 |                                            | 0.027                                                         | 0.0018                                                           | $5.8 \times 10^{-3}$ |
| Cis-Cyclooctene |                                          | 2.458                                              | 0.217                                                 |                                            | 0.027                                                         | 0.0024                                                           | $1.1 \times 10^{-2}$ |

In the case of cyclohexene, if the limit of detection is assumed to be an integral of 0.05 (i.e. 5% of the integral for the internal standard), then the maximum  $K_{eq}$  can be estimated at  $5.1 \times 10^{-4}$ .

## 4 Cross-Coupling Reactions

### 4.1 General Procedure

In an argon-filled glovebox, [Ni(COD)(dppf)] (**1**) was added to a microwave vial equipped with a stir bar. The vial was sealed with a septum-fitted crimp cap and removed from the glovebox. On the Schlenk line, anhydrous THF (1 mL) was added via syringe, followed by phenylmagnesium chloride (0.28 mL, 1.1 equiv.). The vial was heated, with stirring, to 85 °C, and the organotriflate substrate was added *via* microsyringe. The reaction was stirred at 85 °C for 24 h, before being allowed to cool to room temperature. The vial was vented using a needle and then opened. A known mass of *n*-tetradecane was added. The solution was allowed to stir briefly and then a sample was withdrawn for GC-FID analysis. All reactions were performed in duplicate and so average conversions are reported in the manuscript text. The GC-FID apparatus was calibrated using authentic samples of each product, which were prepared as described previously in this document.

### 4.2 Cross-Coupling Reaction Outcomes

**Table S17:** Outcomes of single-substrate cross-coupling reactions (n.d. = not detected).

| Entry | Substrate                                        | Substrate | Product |
|-------|--------------------------------------------------|-----------|---------|
| 1a    | 4-(Trifluoromethyl)phenyl triflate ( <b>2b</b> ) | 8%        | 80%     |
| 1b    |                                                  | 11%       | 78%     |
| 2a    | Cyclopent-1-en-1-yl triflate ( <b>5a</b> )       | 5%        | 48%     |
| 2b    |                                                  | 5%        | 51%     |
| 3a    | Cyclohex-1-en-1-yl triflate ( <b>5b</b> )        | n.d.      | 84%     |
| 3b    |                                                  | n.d.      | 86%     |
| 4a    | Cyclohept-1-en-1-yl triflate ( <b>5c</b> )       | n.d.      | 91%     |
| 4b    |                                                  | n.d.      | 82%     |
| 5a    | Cyclooct-1-en-1-yl triflate ( <b>5d</b> )        | n.d.      | 96%     |
| 5b    |                                                  | n.d.      | 96%     |

**Table S18:** Outcome of competition cross-coupling reaction with 1 equiv. of each of cyclooct-1-en-1-yl triflate (**5d**) and 4-(trifluoromethyl)phenyl triflate (**2a**), plus 1.1 equiv. PhMgCl.

| Replicate | 1-Phenylcyclooct-1-ene | 4-Phenyl-1-(Trifluoromethylphenyl)benzene |
|-----------|------------------------|-------------------------------------------|
| 1         | 49%                    | 51%                                       |
| 2         | 54%                    | 46%                                       |

## 5 NMR Spectra

### 5.1 Alk-1-en-1-yl Triflates

#### Cyclopent-1-en-1-yl triflate (5a)

##### $^1\text{H}$ NMR Spectrum

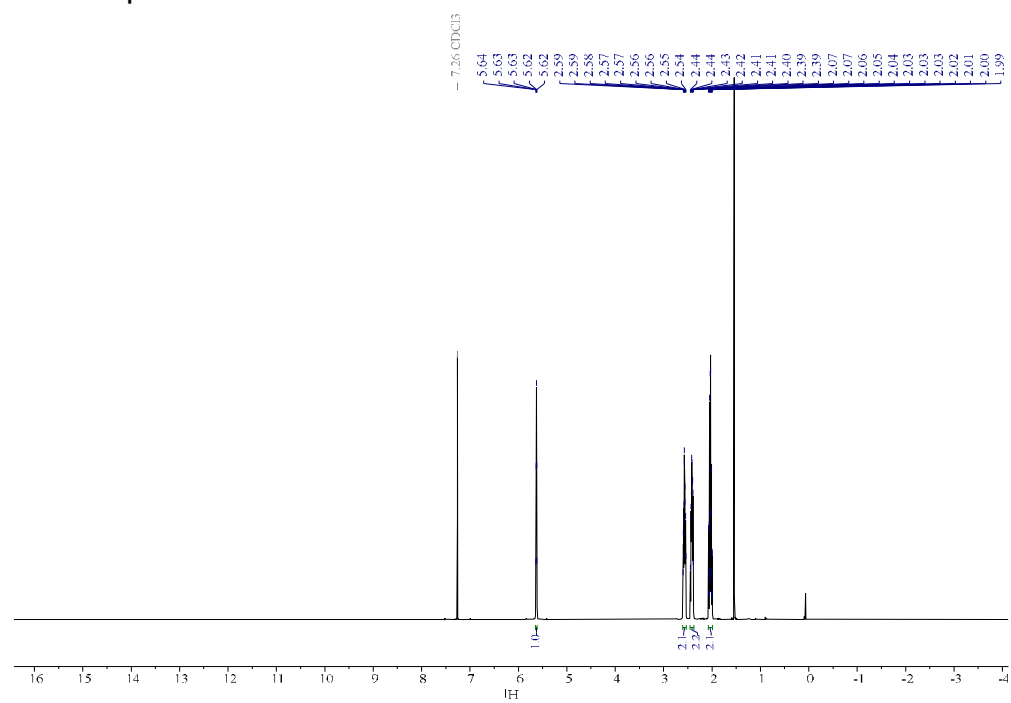

##### $^{13}\text{C}\{^1\text{H}\}$ NMR Spectrum

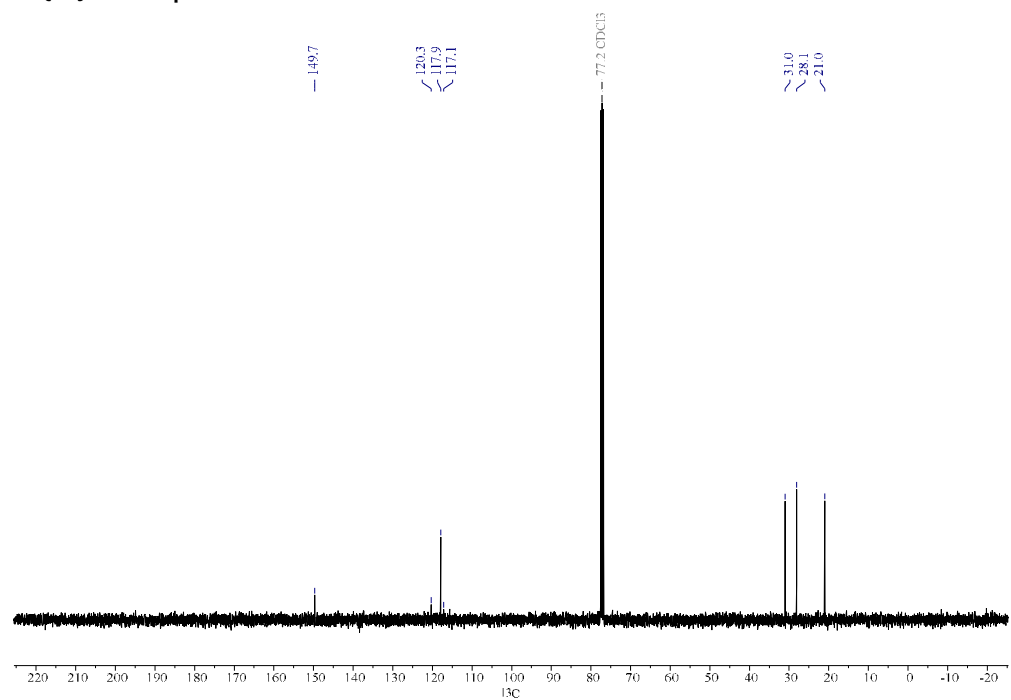



### $^{13}\text{C}\{^1\text{H}\}$ NMR Spectrum

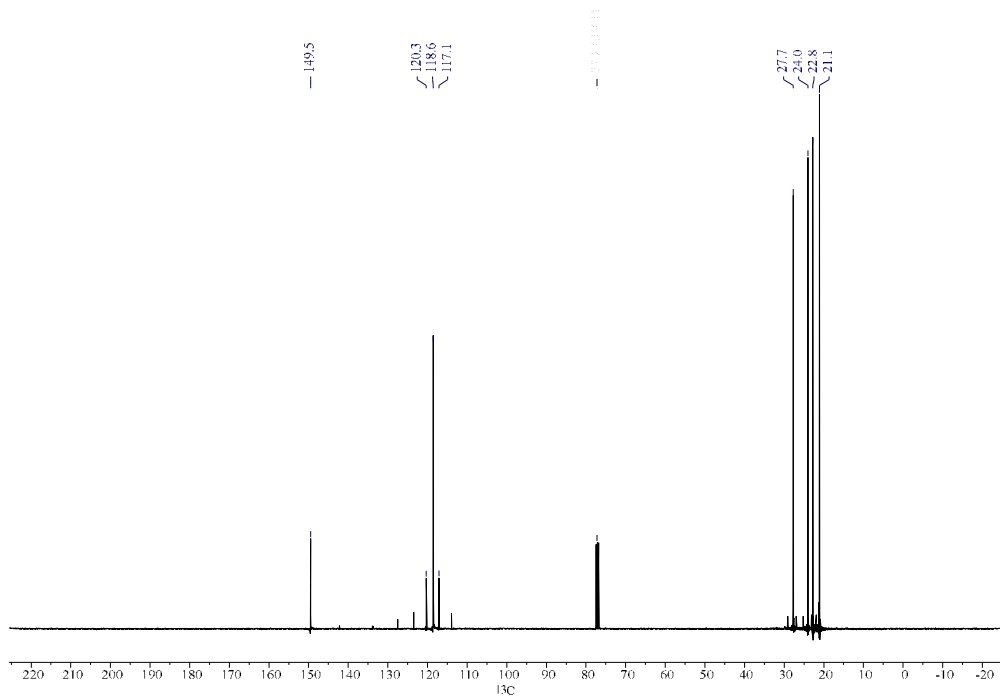

### $^{19}\text{F}\{^1\text{H}\}$ NMR Spectrum

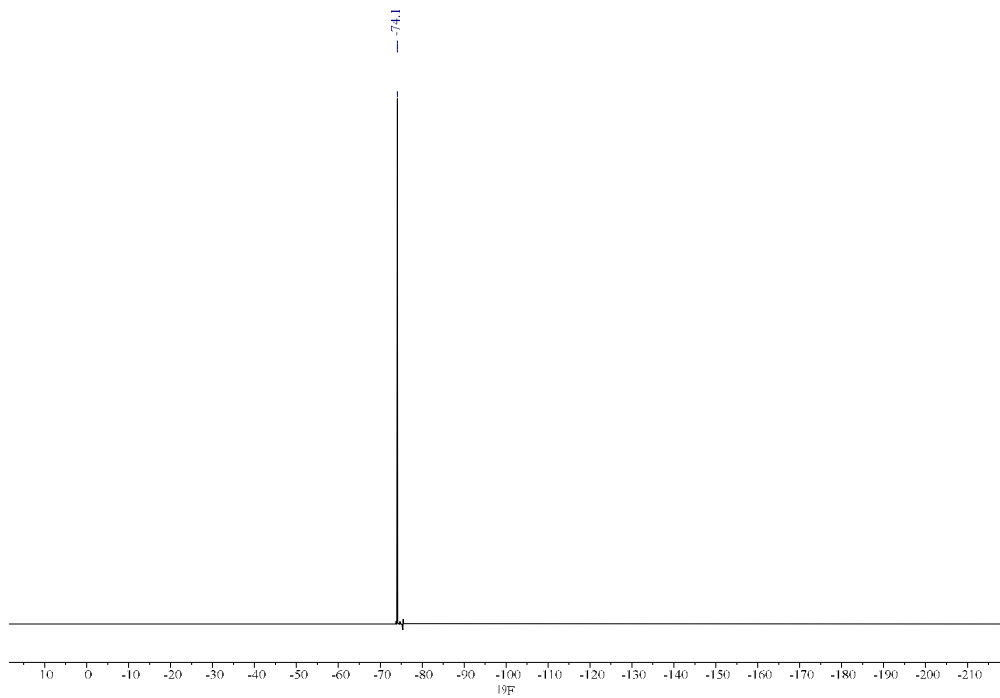

# Cyclohept-1-en-1-yl triflate (5c)

## $^1\text{H}$ NMR Spectrum

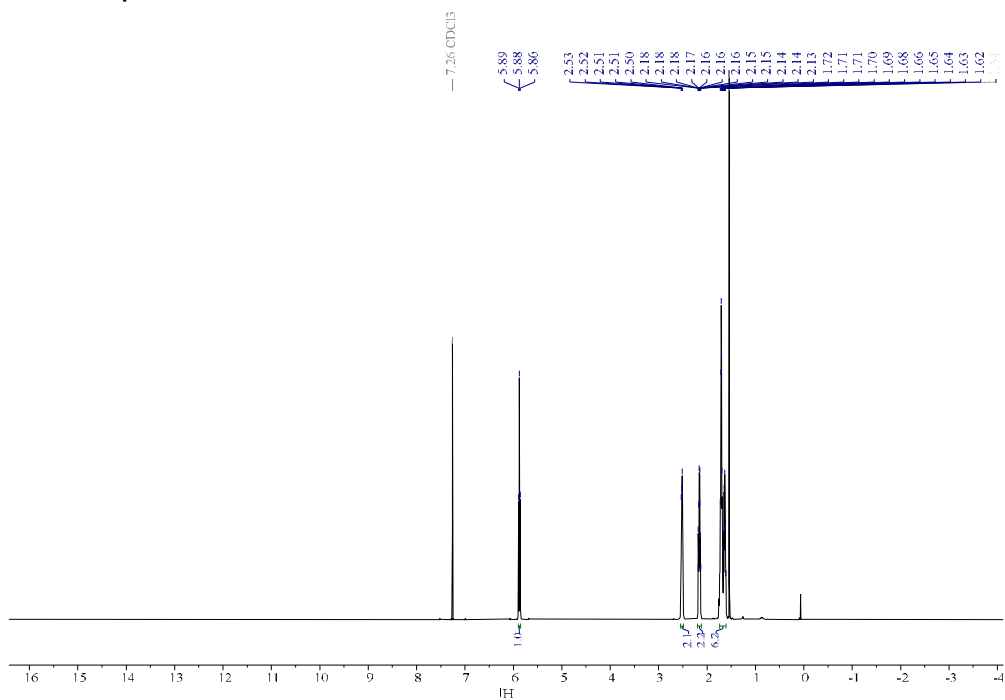

## $^{13}\text{C}\{^1\text{H}\}$ NMR Spectrum

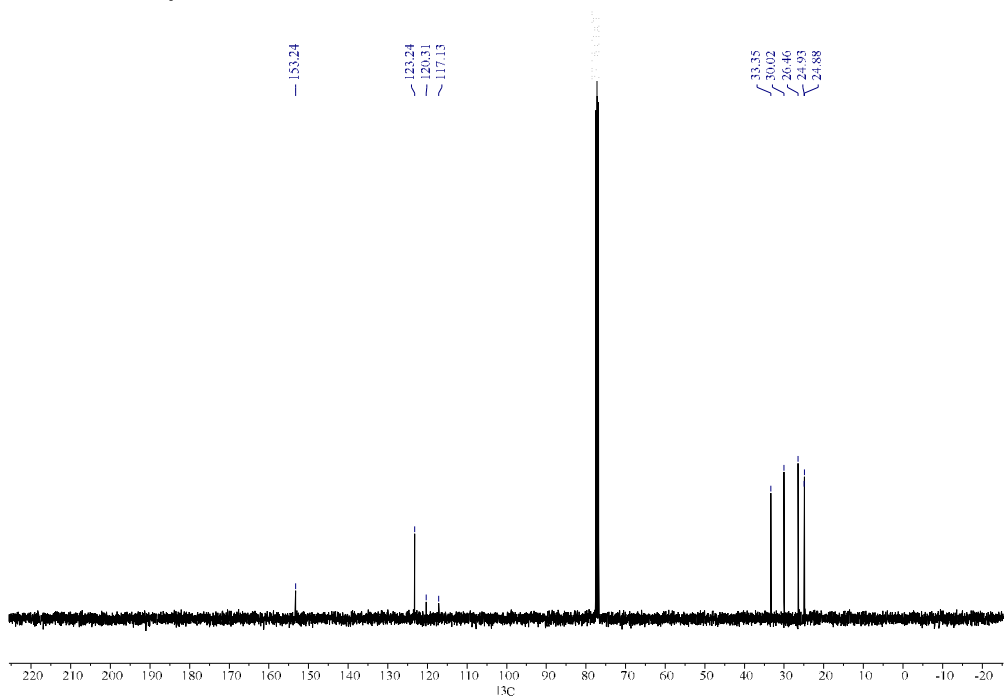

# $^{19}\text{F}\{^1\text{H}\}$ NMR Spectrum

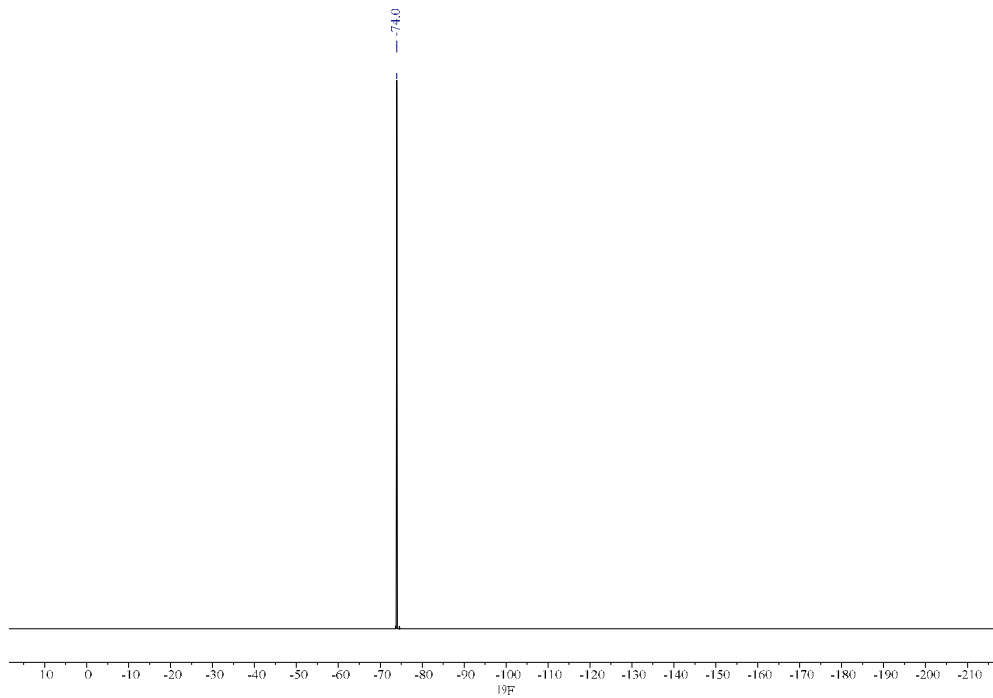

# Cyclooct-1-en-1-yl triflate (5d)

## $^1\text{H}$ NMR Spectrum

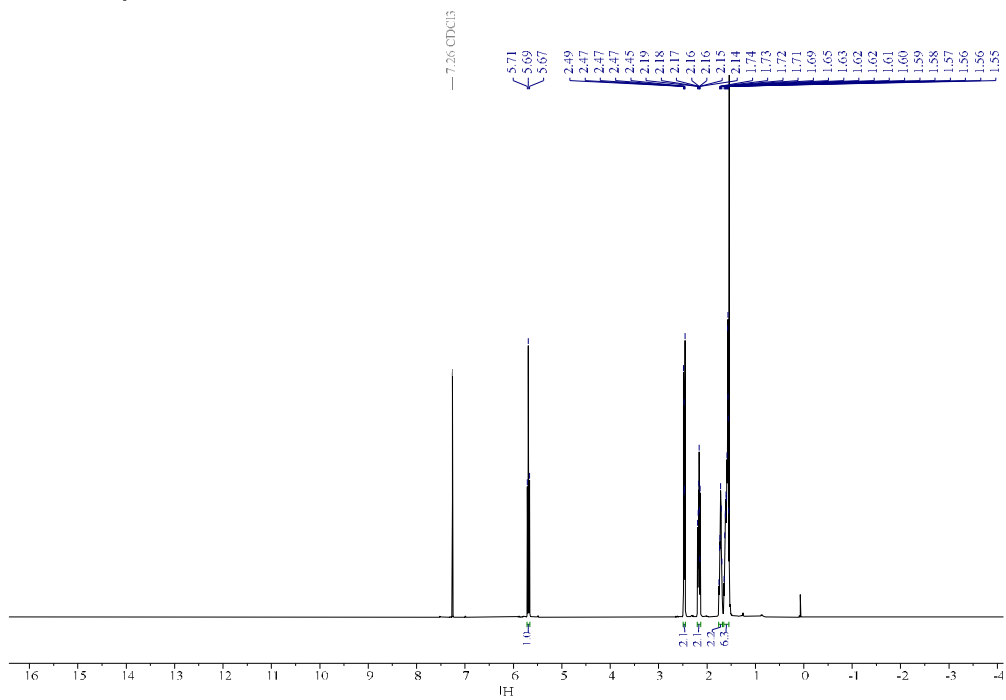

### $^{13}\text{C}\{^1\text{H}\}$ NMR Spectrum

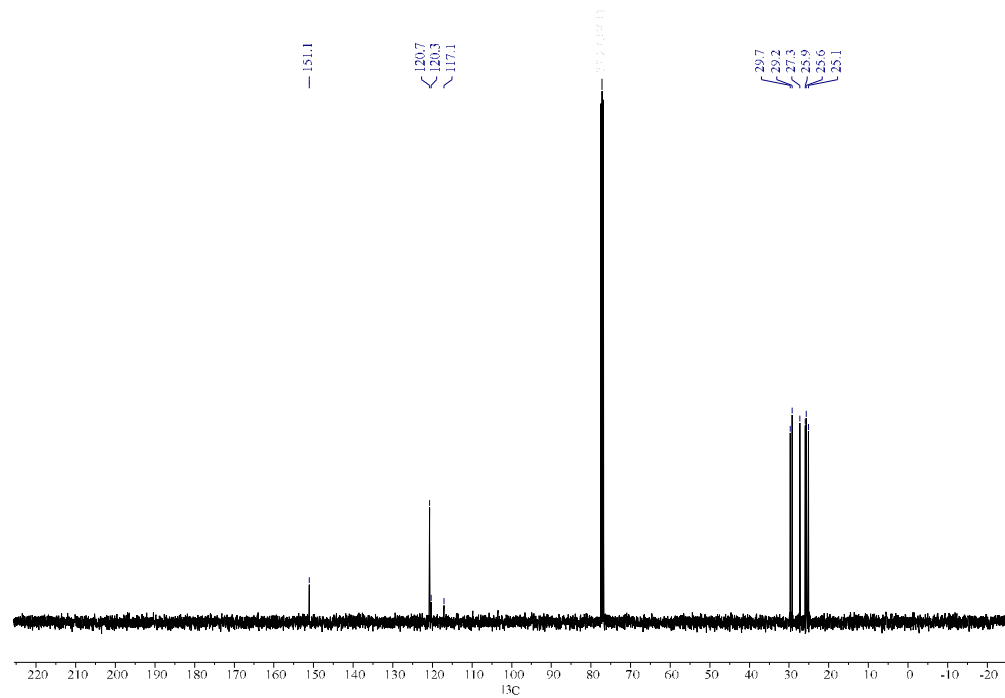

### $^{19}\text{F}\{^1\text{H}\}$ NMR Spectrum

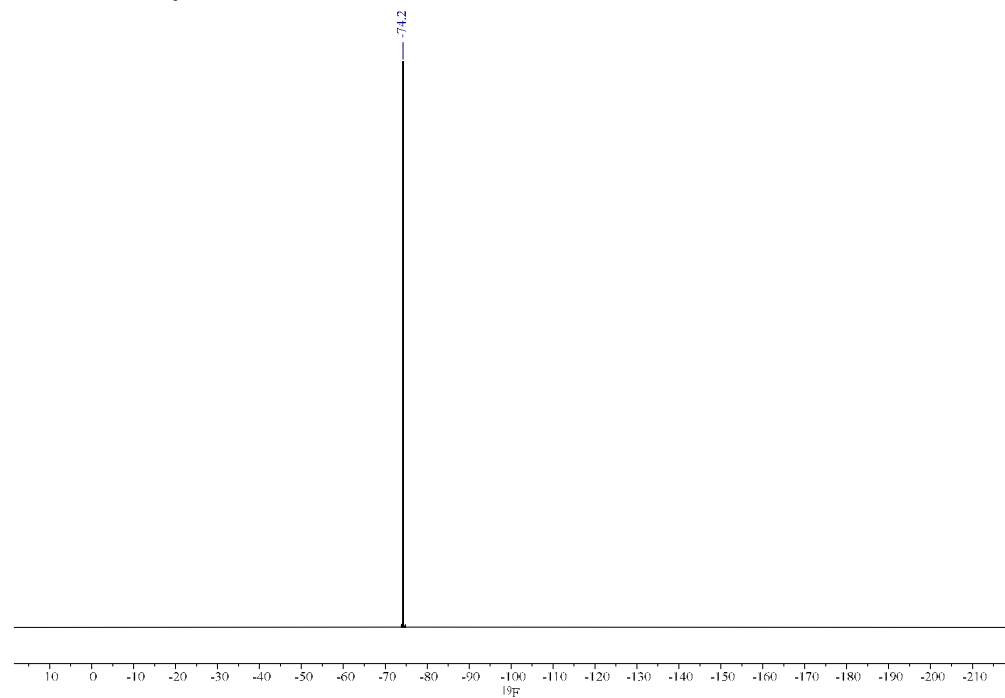

## 5.2 (Hetero)Aryl Triflates

### Phenyl triflate (2c)

#### $^1\text{H}$ NMR Spectrum

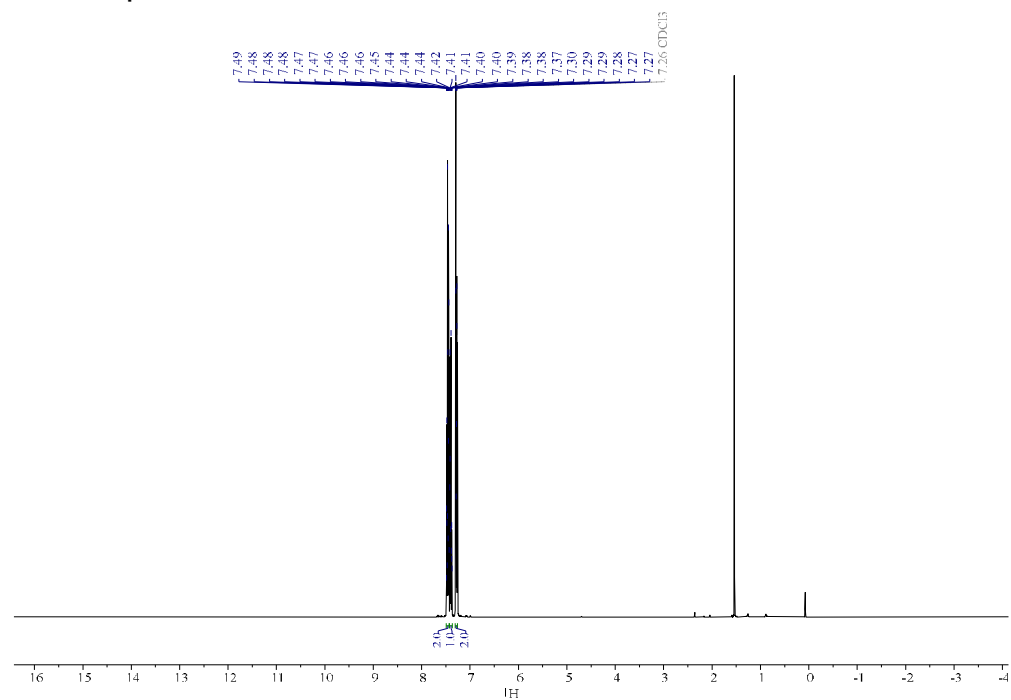

#### $^{13}\text{C}\{^1\text{H}\}$ NMR Spectrum

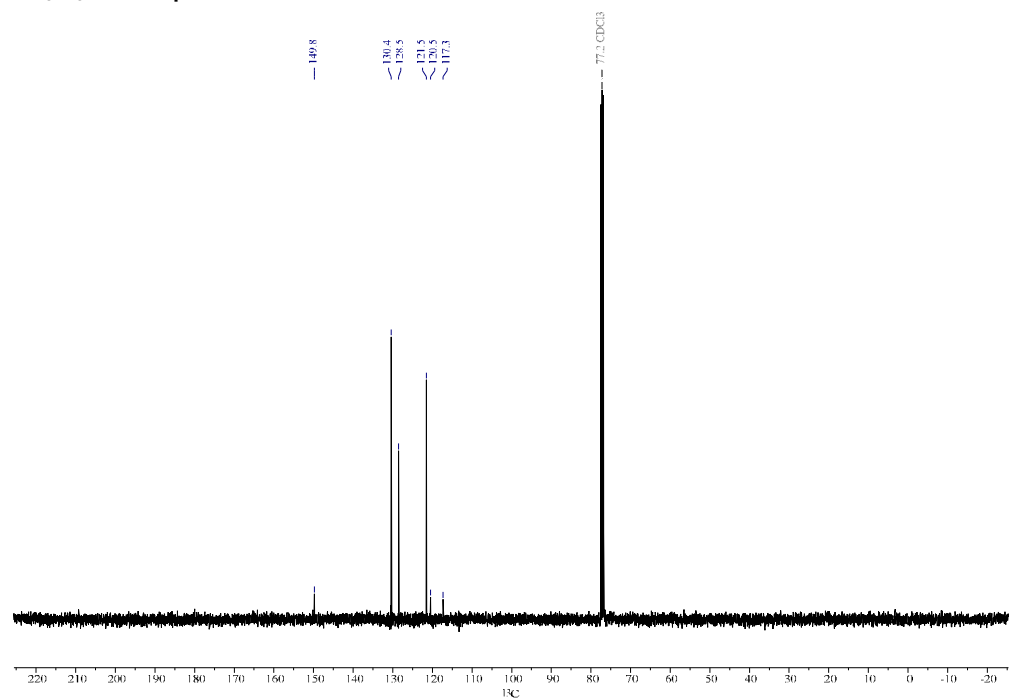

### $^{19}\text{F}\{^1\text{H}\}$ NMR Spectrum

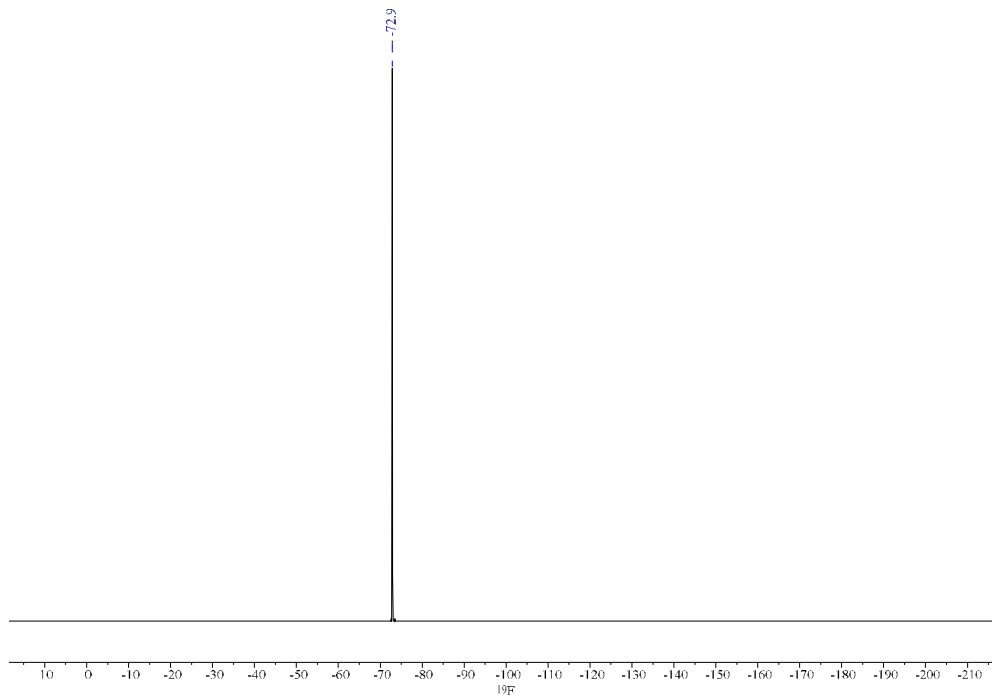

### 3-Pyridinyl triflate (2d)

### $^1\text{H}$ NMR Spectrum

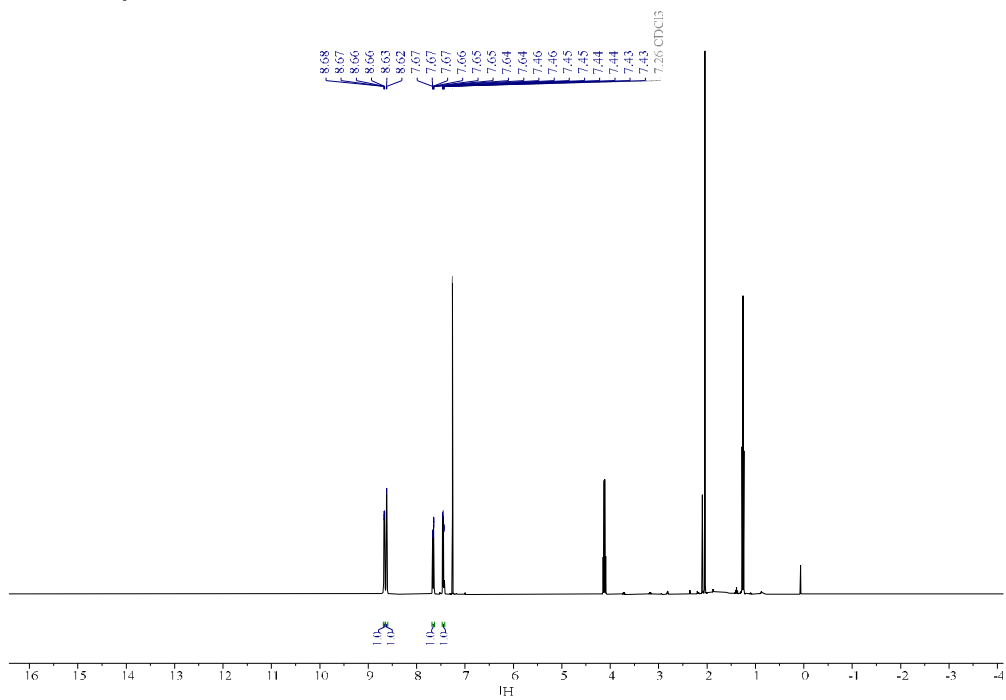

### $^{13}\text{C}\{^1\text{H}\}$ NMR Spectrum

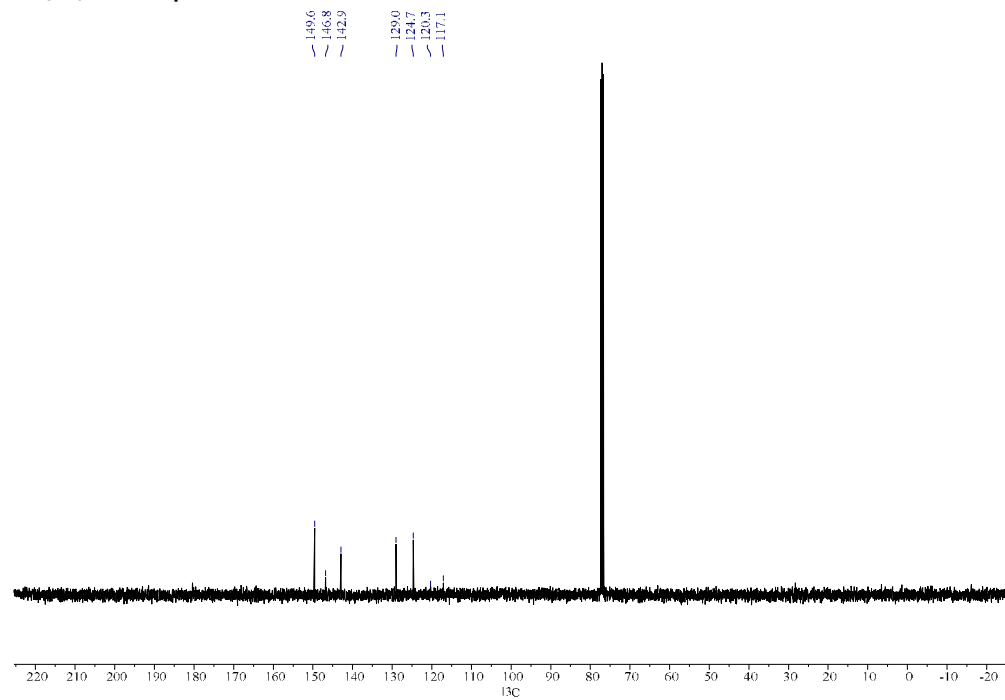

### $^{19}\text{F}\{^1\text{H}\}$ NMR Spectrum

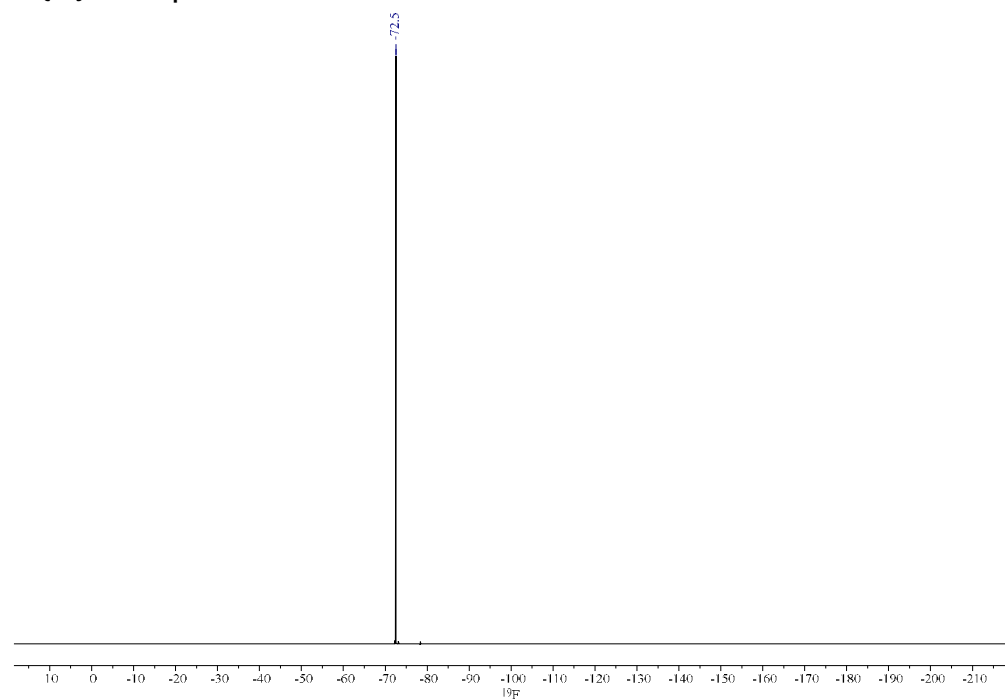

### 5.3 Other Electrophiles

#### Phenyl tosylate (9)

#### <sup>1</sup>H NMR Spectrum

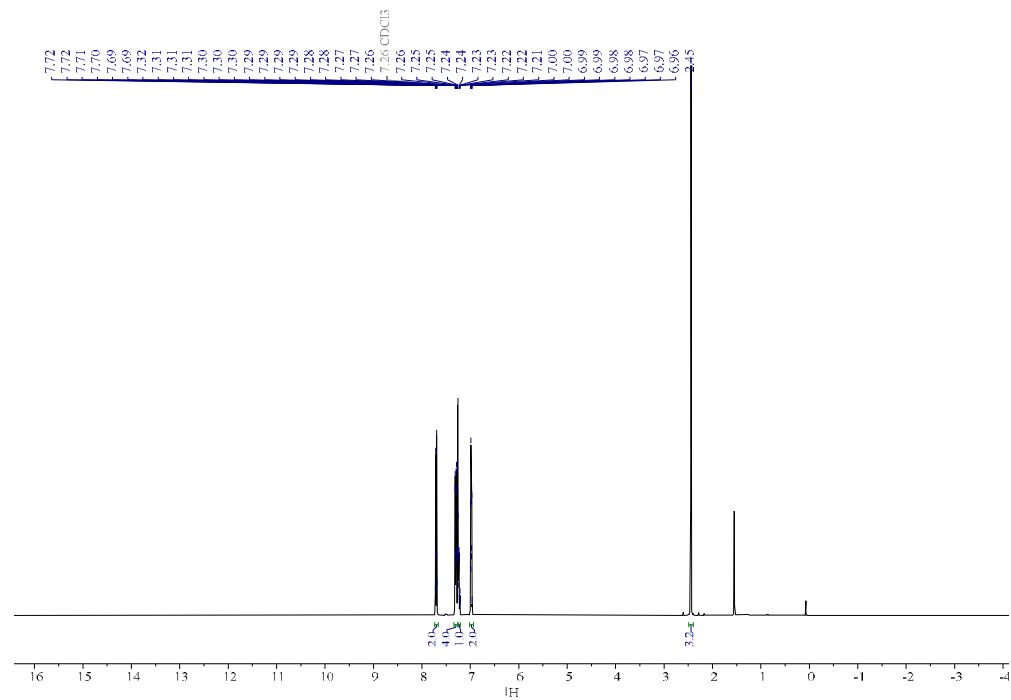

#### <sup>13</sup>C{<sup>1</sup>H} NMR Spectrum

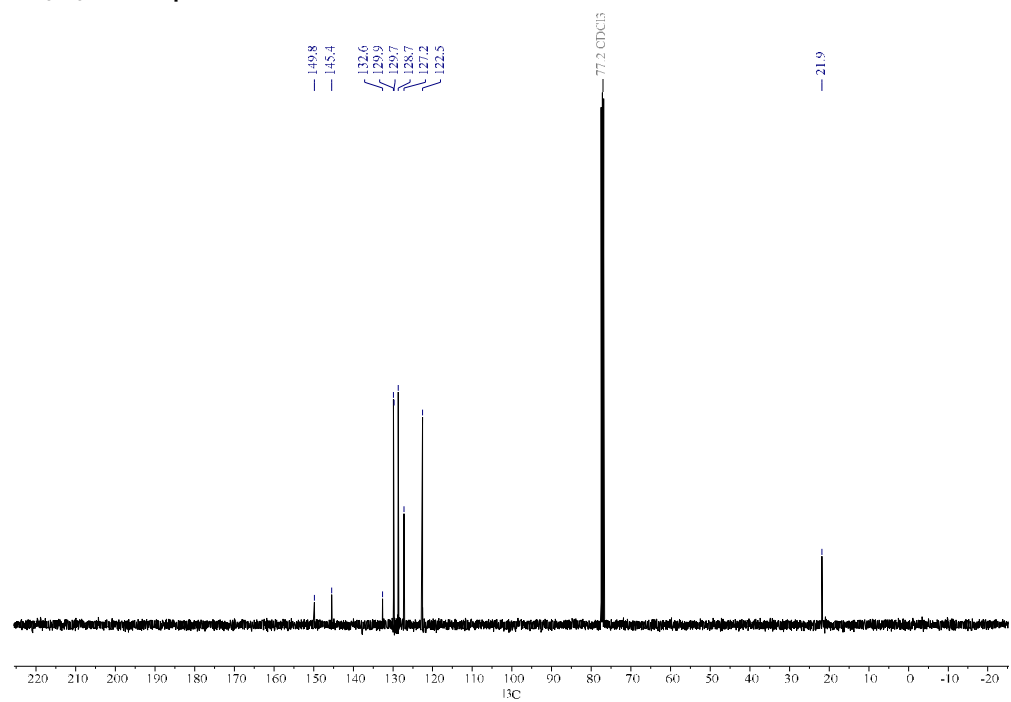

## 5.4 Reaction Products

### [1,1'-Bi(cyclopentane)]-1,1'-diene

#### $^1\text{H}$ NMR Spectrum

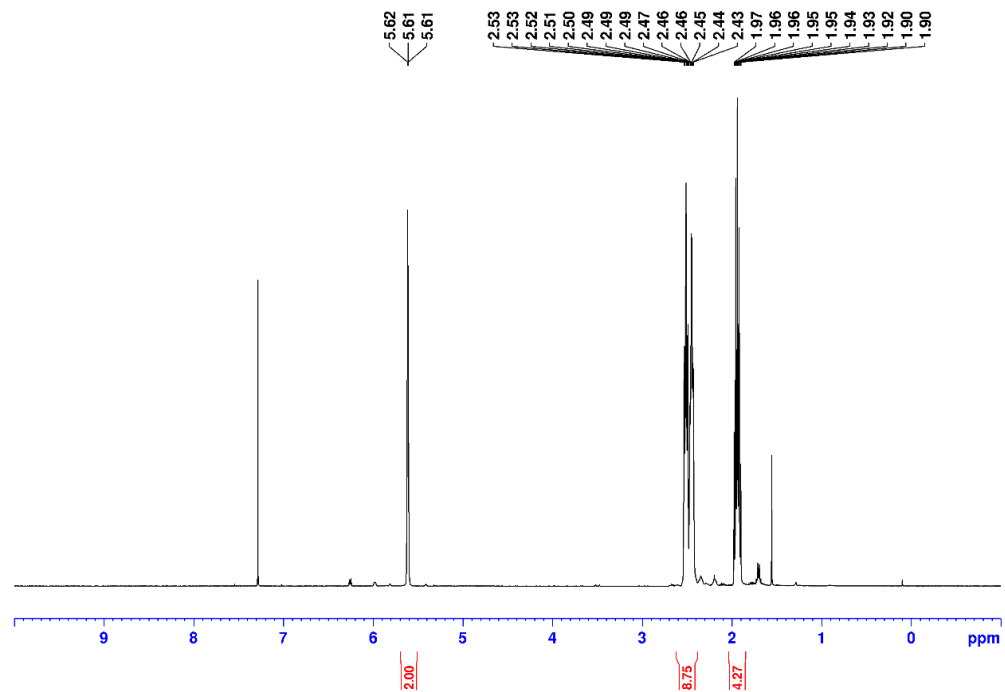

#### $^{13}\text{C}\{^1\text{H}\}$ NMR Spectrum

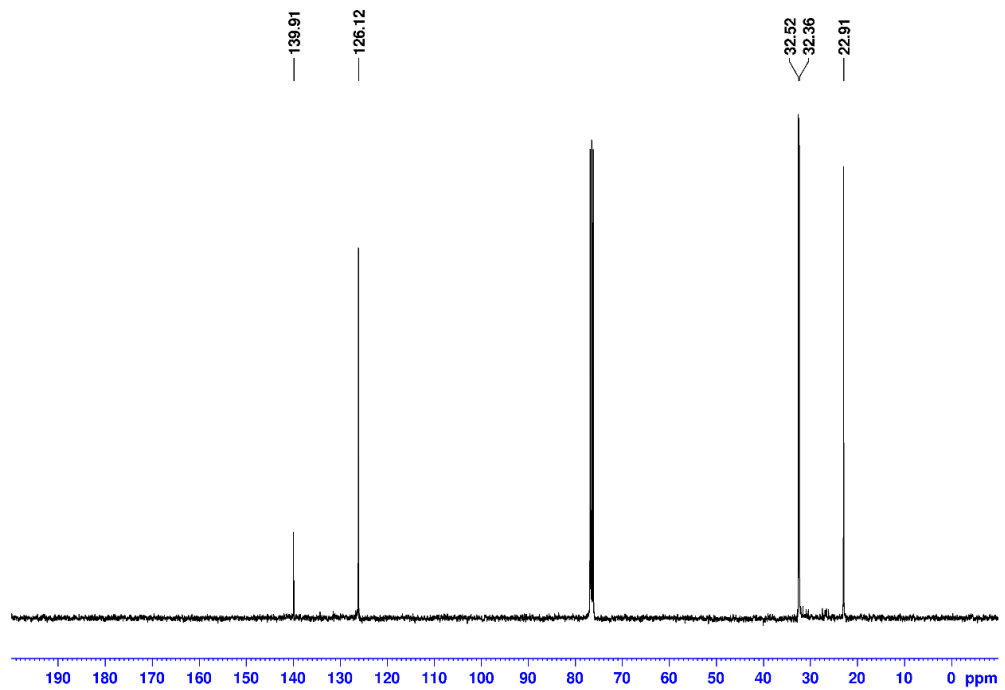

# 4-(Trifluoromethyl)biphenyl

## $^1\text{H}$ NMR Spectrum

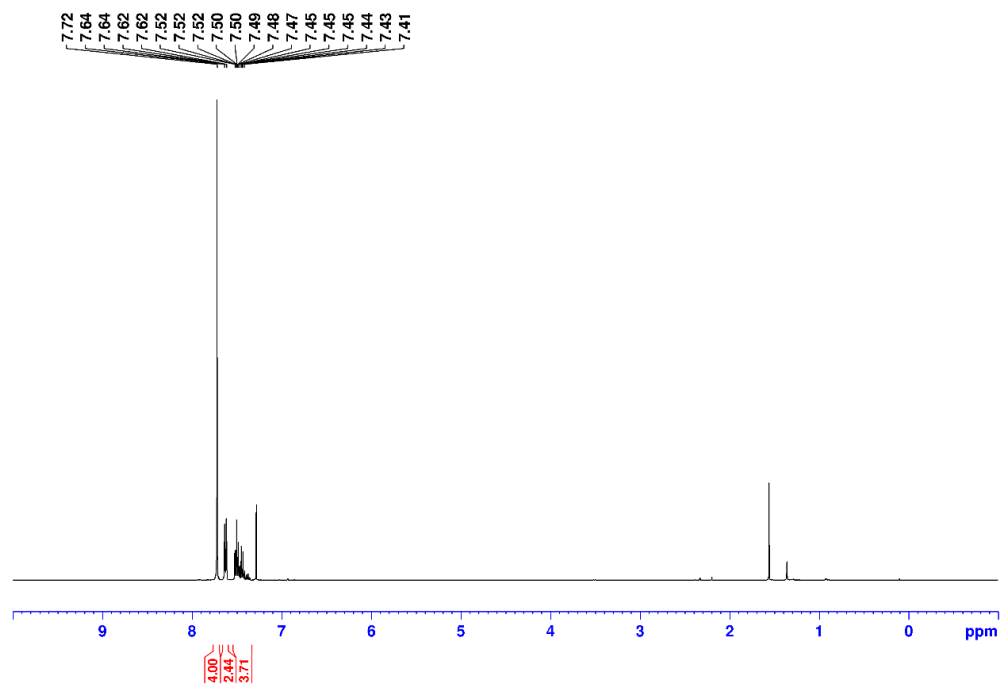

## $^{19}\text{F}\{^1\text{H}\}$ NMR Spectrum

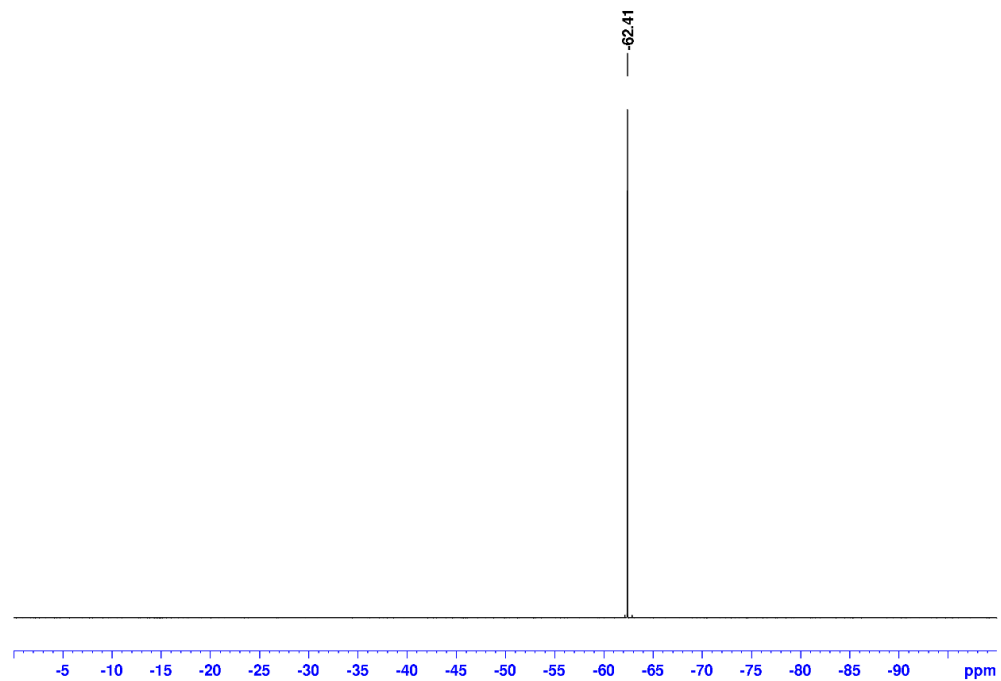

## 6 EPR Spectra

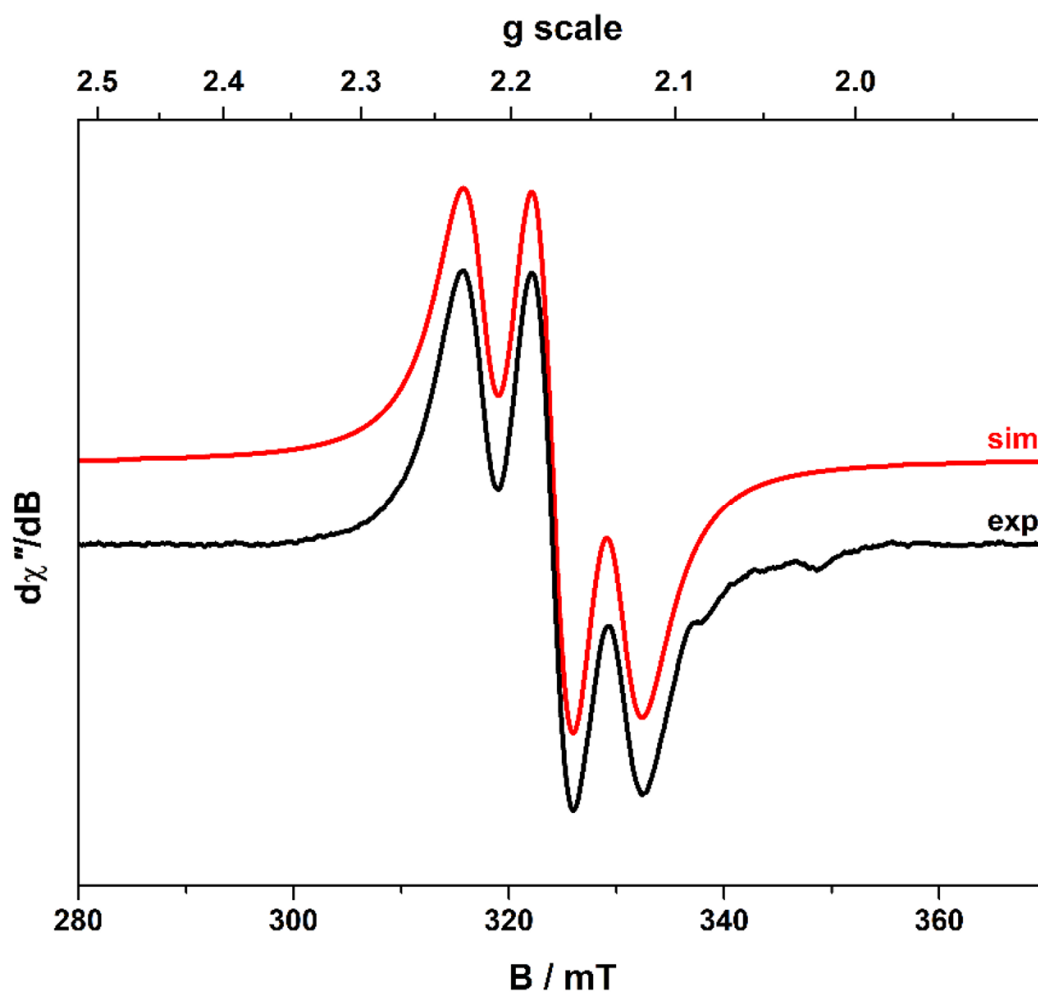

Figure S1. X-band EPR spectrum of  $[\text{Ni}(\text{OTf})(\text{dppf})]$  recorded in THF solution at 293 K (experimental conditions: frequency, 9.8593 GHz; power, 6.3 mW; modulation, 0.6 mT). Experimental spectrum is shown as the black line, simulation as the red trace:  $g_{\text{iso}} = 2.1733$ ;  $A_{\text{iso}} = 65 \times 10^{-4} \text{ cm}^{-1}$ .

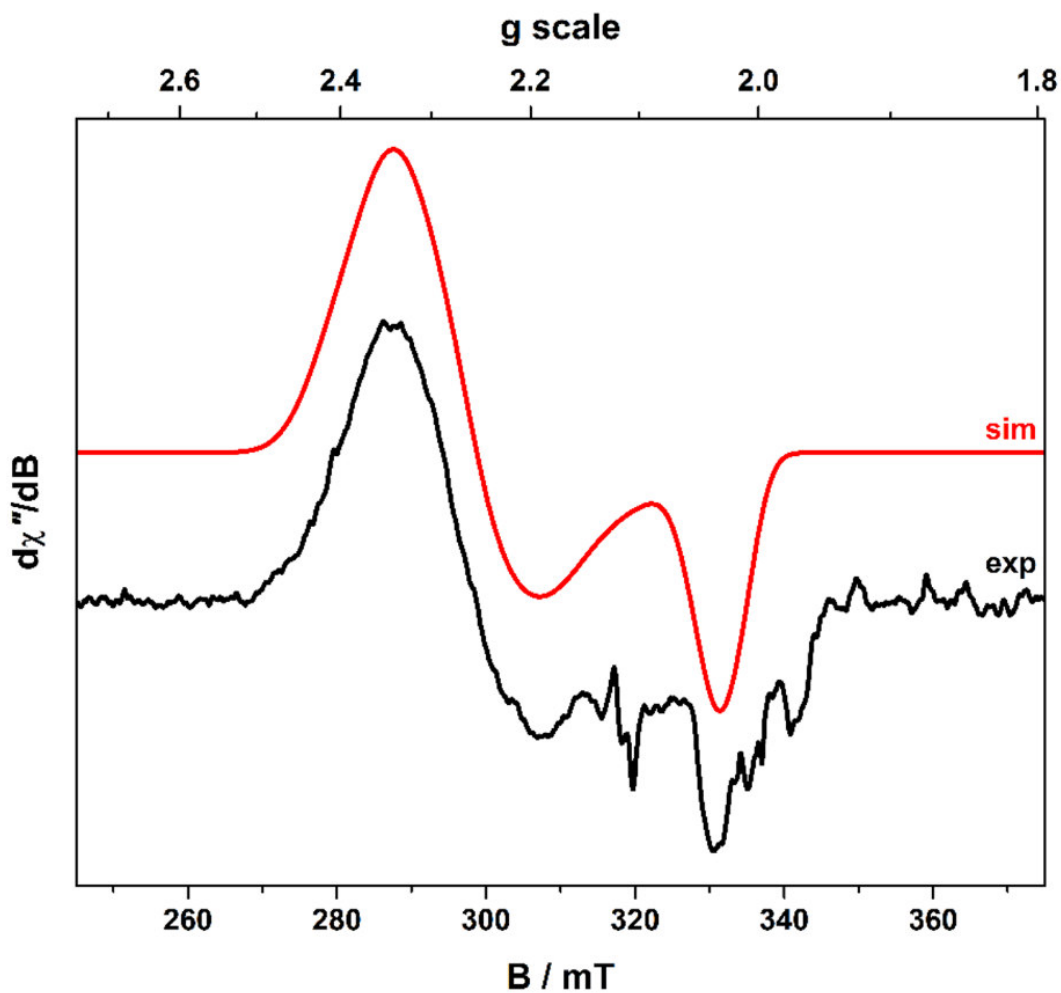

Figure S2. X-band EPR spectrum of [Ni(OTf)(dppf)] recorded in THF solution at 77 K (experimental conditions: frequency, 9.4215 GHz; power, 2.0 mW; modulation, 0.7 mT). Experimental spectrum is shown as the black line, simulation as the red trace:  $g = 2.340, 2.265, 2.035$ ;  $A = (80, 80, 30) \times 10^{-4} \text{ cm}^{-1}$ .

## 7 Computational Studies

### 7.1 Methodology

(Note that the level of theory was selected as a result of a brief benchmarking study, which is described in sections 7.2.1 and 7.2.2, below.)

#### 7.1.1 Conformational Searches

The lowest energy conformer for each structure was identified using CREST<sup>13</sup> to generate ensembles of conformers, which were then evaluated using single point calculations, with the lowest energy species used as input for geometry optimisations. In addition, relevant literature on the known conformations of these species – such as the cycloalkenes – was consulted.

#### 7.1.2 DFT Calculations

Geometry optimisations were carried out using standard convergence criteria and the r<sup>2</sup>SCAN-3c composite functional,<sup>14</sup> implemented in ORCA v6.<sup>15</sup> A frequency calculation was carried out in each case, with all reported stationary points having either zero imaginary frequencies (for minima) or a single imaginary frequency (for transition states).

For transition state structures, the relevant imaginary frequency was animated using Chemcraft to ensure that this corresponded to the process of interest. Following this, IRC calculations were carried out to identify which minima were linked by the transition state. In some cases these were the expected structures, and in others further intermediates were identified; these are discussed in the manuscript text where appropriate.

Free energies were refined using single point calculations at the  $\omega$ B97M-V/ma-Def2-QZVP/SMD(benzene) level of theory;<sup>16–18</sup>  $\omega$ B97M-V includes the VV10 non-local functional for the treatment of van der Waals interactions. Free energies quoted in the manuscript text are therefore the sum of the electronic energy at  $\omega$ B97M-V/ma-Def2-QZVP/SMD(benzene) ( $E_{sp}$ ) and the correction to free energy calculated at r<sup>2</sup>SCAN-3c ( $G_{corr}$ ).

## 7.2 Computational Results

### 7.2.1 Benchmarking: Geometry Optimisations

A brief benchmarking study was carried out to compare geometry optimisation at  $r^2$ SCAN-3c with geometry optimisation at  $\omega$ B97M-V/ma-Def2-SVP. This showed minimal differences in geometry and energy. Table S19 notes the outcomes of this benchmarking.

**Table S19:** Outcomes of geometry benchmarking calculations.

| Structure                    | $\omega$ B97M-V/ma-Def2-SVP |                           | $\omega$ B97M-V/ma-Def2-QZVP/SMD(benzene) |                                |
|------------------------------|-----------------------------|---------------------------|-------------------------------------------|--------------------------------|
|                              | E<br>(Ha)                   | G <sub>corr</sub><br>(Ha) | E<br>(Ha)                                 | G <sub>rel</sub><br>(kcal/mol) |
| COD                          | -311.4981302                | 0.149094                  | -312.0139843                              |                                |
| [Ni(COD)(dppf)]              | -5076.223256                | 0.640419                  | -5079.387008                              | 0                              |
| PhOTf                        | -1192.046815                | 0.081285                  | -1193.286274                              |                                |
| [Ni( $\eta^2$ -PhOTf)(dppf)] | -5956.750929                | 0.572627                  | -5960.642627                              | 10.5                           |
| [Ni(OTf)(Ph)(dppf)]          | -5956.795305                | 0.573726                  | -5960.694070                              | -21.1                          |

### 7.2.2 Benchmarking: Single Point Calculations

A series of different functionals were evaluated for the single point calculations. The ma-Def2-QZVP basis set was deemed sufficient in each case. The free energy change for the displacement of COD from [Ni(COD)(dppf)] (**1**) by cyclopentene was used as a model reaction, noting that the experimental  $K_{eq}$  of  $7.6 \times 10^{-4}$  at 300 K corresponds to  $\Delta G^\circ$  (300 K) = 2.2 kcal mol<sup>-1</sup> (Table S20).

While  $\omega$ r<sup>2</sup>SCAN-D4 achieves the closest match to experiment, we note that this a relatively new functional, relies on empirical dispersion corrections, and has not been widely used, while  $\omega$ B97M-V is acknowledged as a high quality, robust functional that uses the VV10 nonlocal correlation method to treat dispersion effects. We therefore selected the latter for this study.

**Table S20:** Outcomes of single point benchmarking calculations.

| Methodology                                  | $\Delta G^\circ$<br>(kcal mol <sup>-1</sup> ) | $\Delta\Delta G^\circ$ vs exp't<br>(kcal mol <sup>-1</sup> ) |
|----------------------------------------------|-----------------------------------------------|--------------------------------------------------------------|
| Experiment                                   | 2.2                                           |                                                              |
| r <sup>2</sup> SCAN-3c/no solvent model      | 6.8                                           | +4.6                                                         |
| r <sup>2</sup> SCANo-D4/ma-Def2-QZVP         | 0.6                                           | -1.6                                                         |
| $\omega$ r <sup>2</sup> SCAN-D4/ma-Def2-QZVP | 2.3                                           | +0.1                                                         |
| PBEo-D4/ma-Def2-QZVP                         | 1.1                                           | -1.1                                                         |
| $\omega$ B97X-D4(rev)/ma-Def2-QZVP           | -2.4                                          | -4.6                                                         |
| $\omega$ B97X-V/ma-Def2-QZVP                 | -0.1                                          | -2.3                                                         |
| $\omega$ B97M-V/ma-Def2-QZVP                 | 2.6                                           | +0.4                                                         |

### 7.2.3 Alternative Pathways

**Note:** in some cases, below, it will appear that structures should be related by symmetry (e.g. **e2-PhOTf** vs **e2-PhOTf(6)**). However, in these cases, there are differences in the conformations of the diphenylphosphino groups of the dppf ligand.

**Phenyl triflate (2c).** Alternative [Ni( $\eta^2$ -PhOTf)(dppf)] isomers were considered, where nickel coordinates to different positions on the phenyl triflate substrate (**e2-PhOTf(2)** – **e2-PhOTf(6)**); however, all of these are higher in energy than the productive  $\eta^2$ -complex **e2-PhOTf**.

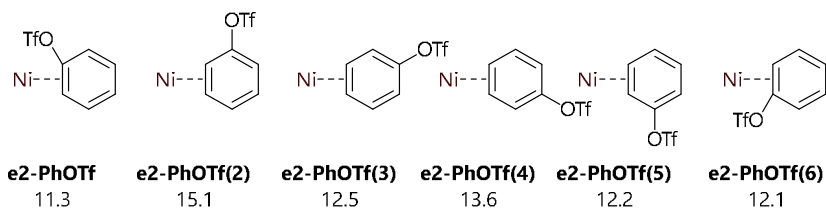**Figure S3.** Isomers of [Ni( $\eta^2$ -PhOTf)(dppf)] and their Gibbs free energies.

2-Pyridinyl triflate (**2b**). A total of twelve isomers of  $[\text{Ni}(\eta^2\text{-2PyOTf})(\text{dppf})]$  were examined, of which four can lead to productive oxidative addition. The preferred pathway proceeds *via* the second-lowest energy  $\eta^2$ -complex. The other three productive isomers of  $[\text{Ni}(\eta^2\text{-2PyOTf})(\text{dppf})]$  present higher barriers. Figure S4 outlines all of the possible structures that were characterised computationally.

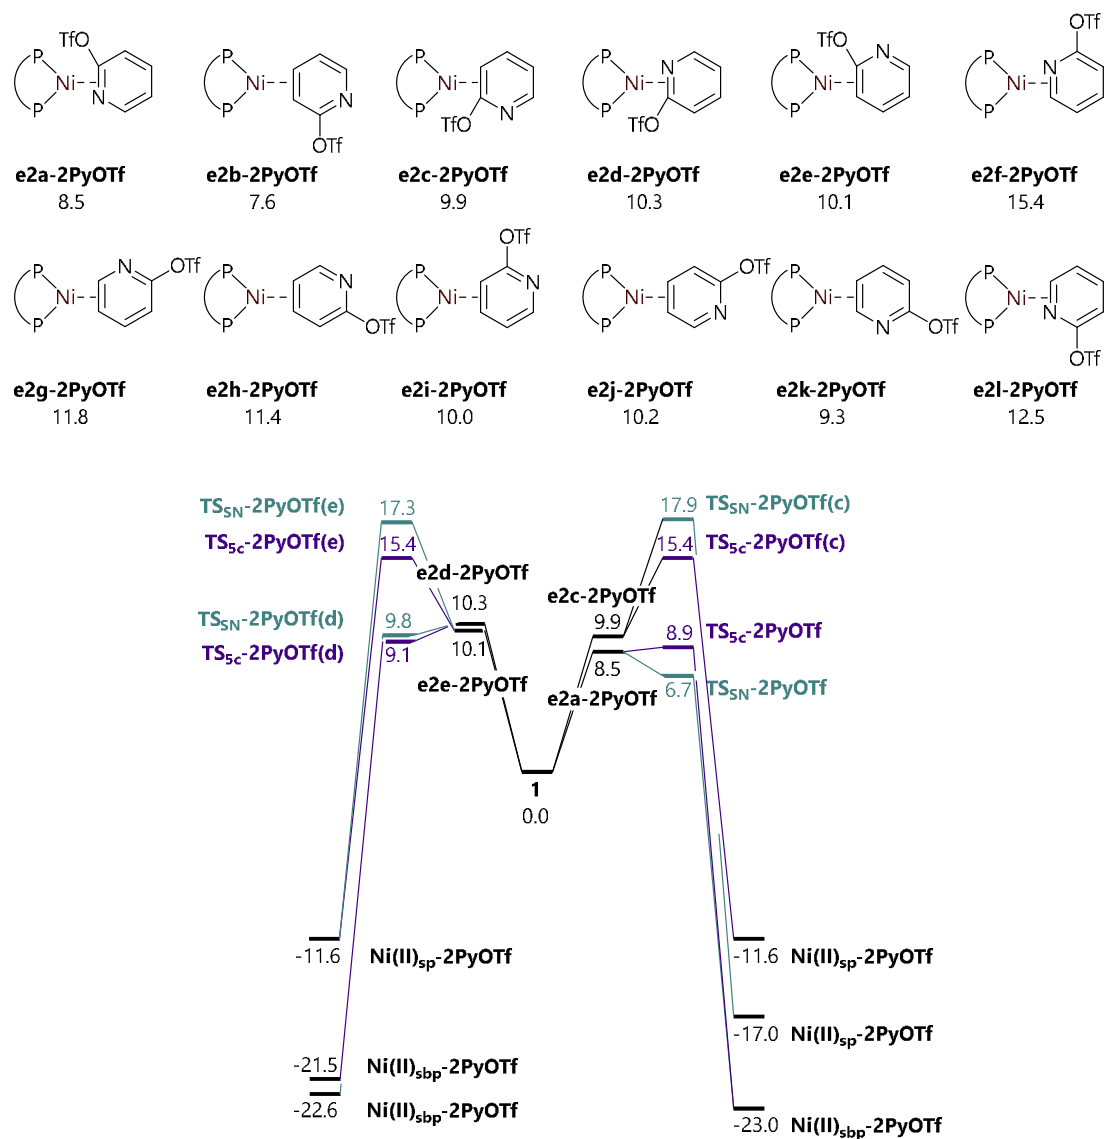

Figure S4. All pathways considered for the reaction of 2-pyridinyl triflate (**2b**) with  $[\text{Ni}(\text{COD})(\text{dppf})]$  (**1**). Energies are Gibbs free energies in kcal mol<sup>-1</sup>.

3-pyridinyl triflate (**2d**). Similarly to the 2-pyridinyl triflate substrate, a total of twelve isomers of  $[\text{Ni}(\eta^2\text{-3PyOTf})(\text{dppf})]$  were examined, of which four can lead to productive oxidative addition. The preferred pathways proceed *via* the lowest and second-lowest energy  $\eta^2$ -complexes. The other three productive isomers of  $[\text{Ni}(\eta^2\text{-2PyOTf})(\text{dppf})]$  present higher barriers. Figure S5 outlines all of the possible structures that were characterised computationally.

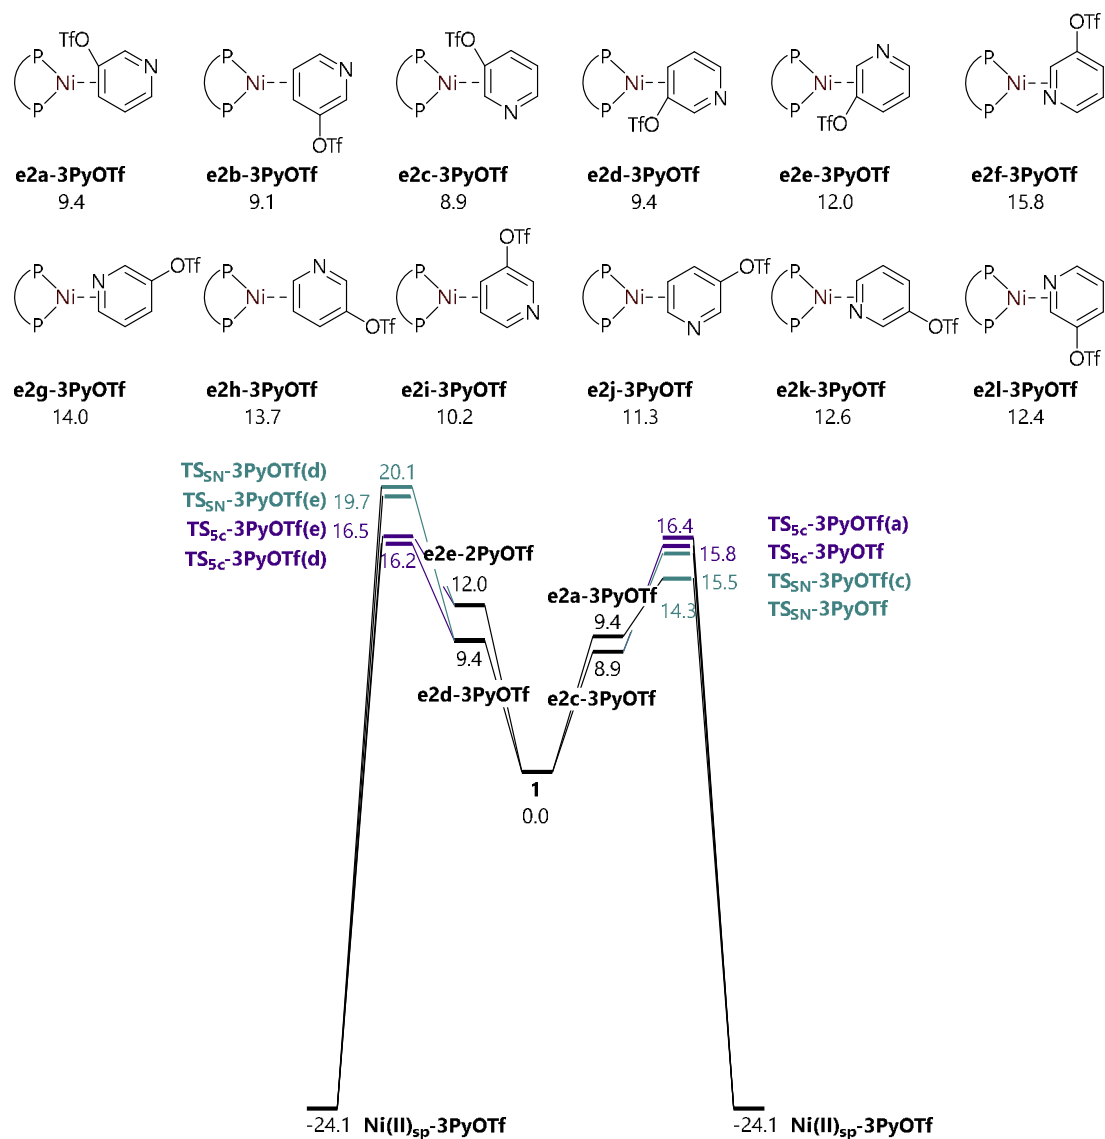

Figure S5. All pathways considered for the reaction of 3-pyridinyl triflate (**2d**) with  $[\text{Ni}(\text{COD})(\text{dppf})]$  (**1**). Energies are Gibbs free energies in kcal mol<sup>-1</sup>.

Cyclohex-1-en-1-yl triflate (**5b**). The alternative pathway involving boat conformations presents higher barriers for both the S<sub>N</sub>-type and five-centred oxidative addition pathways (Figure S6). Both pathways *via* boat intermediates and transition states lead initially to a distorted square-based pyramidal complex.

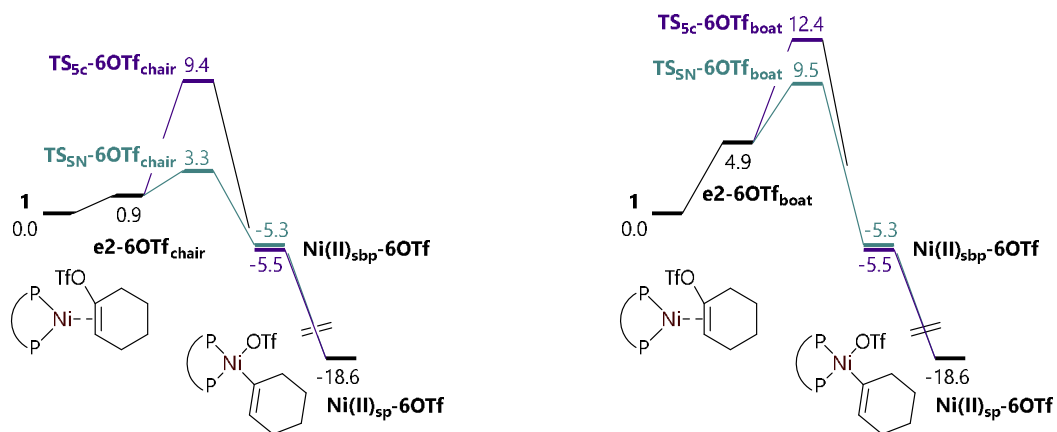

Figure S6. All considered pathways for the oxidative addition of cyclohex-1-en-1-yl triflate (**5b**) to [Ni(COD)(dppf)] (**1**). Energies are Gibbs free energies in kcal mol<sup>-1</sup>.

Cyclohept-1-en-1-yl triflate (**5c**). The alternative pathway involving boat conformations presents higher barriers for both the S<sub>N</sub>-type and five-centred oxidative addition pathways (Figure S7). These pathways *via* boat intermediates and transition states also lead initially to a distorted square-based pyramidal complex.

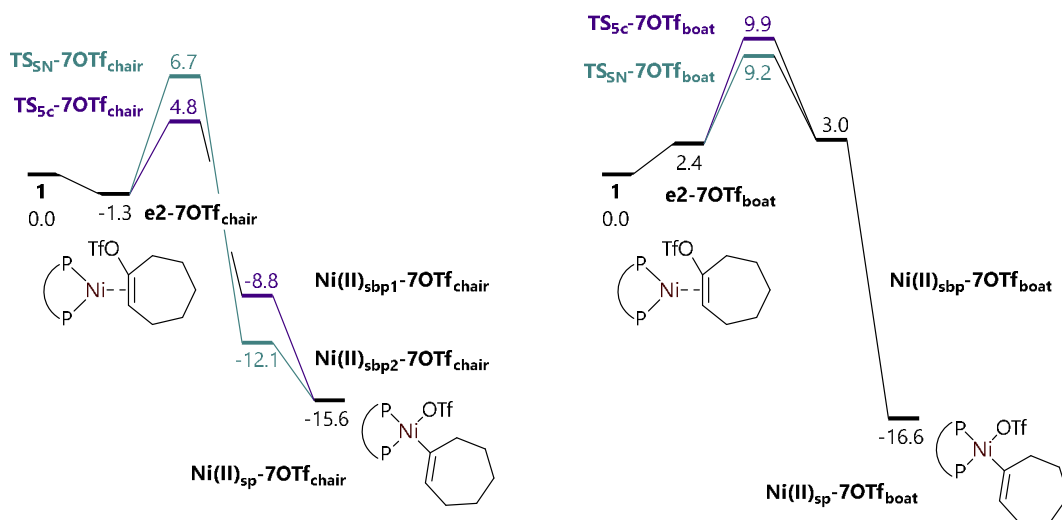

Figure S7. All considered pathways for the oxidative addition of cyclohept-1-en-1-yl triflate (**5c**) to [Ni(COD)(dppf)] (**1**). Energies are Gibbs free energies in kcal mol<sup>-1</sup>.

Cyclooct-1-en-1-yl triflate (**5d**). These reactions can proceed through four different conformations, which we label A-D in the same way as Neuenschwander and Hermans<sup>19</sup> (Figure S8). While conformation D gives the lowest energy  $\eta^2$ -complex, the most productive pathway is *via* conformation A. The relative energies of each conformation of **5d** are recorded in Table S21 for comparison.

**Table S21.** Relative energies of the conformations of cyclooct-1-en-1-yl triflate (**5d**).

| Conformation                               | A   | B   | C   | D   |
|--------------------------------------------|-----|-----|-----|-----|
| $G_{\text{rel}}$ (kcal mol <sup>-1</sup> ) | 0.0 | 0.7 | 4.8 | 2.2 |

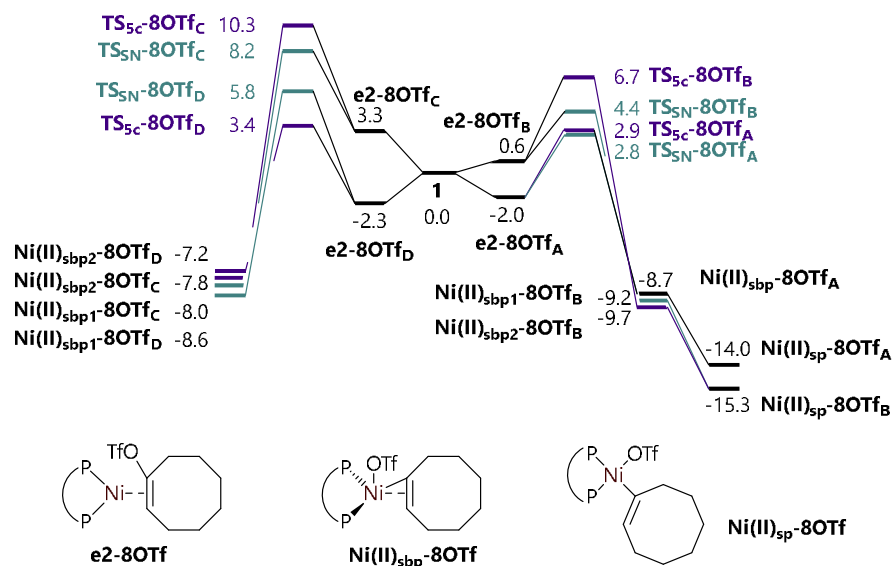

**Figure S8.** All considered pathways for the oxidative addition of cyclooct-1-en-1-yl triflate (**5d**) to [Ni(COD)(dppf)] (**1**). Energies are Gibbs free energies in kcal mol<sup>-1</sup>.

## 7.2.4 Table of Energies

**Table S22:** Energies of all structures characterised as part of this work.

| Structure                           | r2SCAN-3c    |                        | $\omega$ B97M-V/ma-Def2-QZVP/SMD(benzene) |                             |
|-------------------------------------|--------------|------------------------|-------------------------------------------|-----------------------------|
|                                     | G (Ha)       | G <sub>corr</sub> (Ha) | E (Ha)                                    | G <sub>rel</sub> (kcal/mol) |
| COD                                 | -311.785955  | 0.148113               | -312.014786                               |                             |
| [Ni(COD)(dppf)]                     | -5078.365247 | 0.632949               | -5079.389560                              |                             |
| cpent-OTf ( <b>5a</b> )             | -1155.974778 | 0.096193               | -1156.354682                              |                             |
| <b>ez-5OTf</b>                      | -5922.550877 | 0.578840               | -5923.731976                              | -3.0                        |
| <b>TS(SN)-5OTf</b>                  | -5922.525750 | 0.576960               | -5923.715287                              | 6.3                         |
| <b>Ni(II)(os)-5OTf</b>              | -5922.530693 | 0.575684               | -5923.727842                              | -2.3                        |
| <b>TS(5c)-5OTf</b>                  | -5922.528079 | 0.577870               | -5923.713851                              | 7.8                         |
| <b>Ni(II)(sp)-5OTf</b>              | -5922.561458 | 0.578757               | -5923.759180                              | -20.1                       |
| [Ni(dppf)(cpent-OTf) <sub>2</sub> ] | -7078.477399 | 0.707898               | -7080.056931                              | 36.3                        |
| chex-OTf ( <b>5b</b> )              | -1195.258149 | 0.124314               | -1195.674231                              |                             |
| <b>ez-6OTf(chair)</b>               | -5961.828573 | 0.607336               | -5963.045740                              | 0.9                         |
| <b>TS(SN)-6OTf(chair)</b>           | -5961.810392 | 0.602417               | -5963.036936                              | 3.3                         |
| <b>Ni(II)(sbp)-6OTf(chair)</b>      | -5961.826201 | 0.604605               | -5963.052959                              | -5.3                        |
| <b>TS(5c)-6OTf(chair)</b>           | -5961.814117 | 0.605795               | -5963.030686                              | 9.4                         |
| <b>Ni(II)(sbp)-6OTf(chair)</b>      | -5961.828434 | 0.604419               | -5963.052995                              | -5.5                        |
| <b>ez-6OTf(boat)</b>                | -5961.822794 | 0.605924               | -5963.038044                              | 4.9                         |
| <b>TS(SN)-6OTf(boat)</b>            | -5961.801561 | 0.604420               | -5963.029181                              | 9.5                         |
| <b>Ni(II)(sbp)-6OTf(boat)</b>       | -5961.828167 | 0.604682               | -5963.052938                              | -5.3                        |
| <b>TS(5c)-6OTf(boat)</b>            | -5961.808332 | 0.605284               | -5963.025317                              | 12.4                        |
| <b>Ni(II)(sbp)-6OTf(boat)</b>       | -5961.828448 | 0.604408               | -5963.053057                              | -5.5                        |
| <b>Ni(II)(sp)-6OTf</b>              | -5961.845055 | 0.606953               | -5963.076415                              | -18.6                       |
| chept-OTf ( <b>5c</b> ) (chair)     | -1234.524906 | 0.151967               | -1234.976534                              |                             |
| <b>ez-7OTf(chair)</b>               | -6001.098833 | 0.634900               | -6002.351431                              | -1.3                        |
| <b>TS(SN)-7OTf(chair)</b>           | -6001.079572 | 0.630701               | -6002.334452                              | 6.7                         |
| <b>Ni(II)(sbp)-7OTf(chair)</b>      | -6001.103019 | 0.632752               | -6002.366473                              | -12.1                       |
| <b>TS(5c)-7OTf(chair)</b>           | -6001.087436 | 0.633558               | -6002.340338                              | 4.8                         |
| <b>Ni(II)(sbp)-7OTf(chair)</b>      | -6001.094800 | 0.634462               | -6002.363019                              | -8.8                        |
| <b>Ni(II)(sp)-7OTf(chair)</b>       | -6001.107825 | 0.633827               | -6002.373252                              | -15.6                       |
| chept-OTf ( <b>5c</b> ) (boat)      | -1234.519819 | 0.151896               | -1234.971989                              |                             |
| <b>ez-7OTf(boat)</b>                | -6001.092925 | 0.634675               | -6002.345295                              | 2.4                         |
| <b>TS(SN)-7OTf(boat)</b>            | -6001.076387 | 0.631674               | -6002.331565                              | 9.2                         |
| <b>Ni(II)(sbp)-7OTf(boat)</b>       | -6001.089538 | 0.632616               | -6002.342294                              | 3.0                         |
| <b>TS(5c)-7OTf(boat)</b>            | -6001.081613 | 0.634142               | -6002.332794                              | 9.9                         |
| <b>Ni(II)(sbp)-7OTf(boat)</b>       | -6001.091152 | 0.632442               | -6002.342148                              | 3.0                         |
| <b>Ni(II)(sp)-7OTf(boat)</b>        | -6001.107681 | 0.634694               | -6002.375598                              | -16.6                       |
| coct-OTf ( <b>5d</b> ) (A)          | -1273.793867 | 0.179739               | -1274.280584                              |                             |
| <b>ez-8OTf(A)</b>                   | -6040.368099 | 0.661935               | -6041.655838                              | -2.0                        |
| <b>TS(SN)-8OTf(A)</b>               | -6040.355116 | 0.660169               | -6041.646539                              | 2.8                         |
| <b>Ni(II)(sbp)-8OTf(A)</b>          | -6040.367783 | 0.659918               | -6041.664506                              | -8.7                        |
| <b>TS(5c)-8OTf(A)</b>               | -6040.357682 | 0.661068               | -6041.647264                              | 2.9                         |
| <b>Ni(II)(sbp)-8OTf(A)</b>          | -6040.367960 | 0.659682               | -6041.664277                              | -8.7                        |
| <b>Ni(II)(sp)-8OTf(A)</b>           | -6040.370700 | 0.663139               | -6041.676173                              | -14.0                       |

|                            |              |          |              |       |
|----------------------------|--------------|----------|--------------|-------|
| coct-OTf (5d) (B)          | -1273.791738 | 0.180493 | -1274.280260 |       |
| <b>e2-8OTf(B)</b>          | -6040.364822 | 0.663039 | -6041.652932 | 0.6   |
| <b>TS(SN)-8OTf(B)</b>      | -6040.353269 | 0.659282 | -6041.642975 | 4.4   |
| <b>Ni(II)(sbp)-8OTf(B)</b> | -6040.364674 | 0.662369 | -6041.667779 | -9.2  |
| <b>TS(5c)-8OTf(B)</b>      | -6040.352219 | 0.662016 | -6041.642108 | 6.7   |
| <b>Ni(II)(sbp)-8OTf(B)</b> | -6040.365185 | 0.661663 | -6041.667872 | -9.7  |
| <b>Ni(II)(sp)-8OTf(B)</b>  | -6040.373837 | 0.662669 | -6041.677894 | -15.3 |
| coct-OTf (5d) (C)          | -1273.784831 | 0.179502 | -1274.272742 |       |
| <b>e2-8OTf(C)</b>          | -6040.360585 | 0.662874 | -6041.648329 | 3.3   |
| <b>TS(SN)-8OTf(C)</b>      | -6040.348705 | 0.660169 | -6041.637940 | 8.2   |
| <b>Ni(II)(sbp)-8OTf(C)</b> | -6040.362603 | 0.662453 | -6041.665974 | -8.0  |
| <b>TS(5c)-8OTf(C)</b>      | -6040.346548 | 0.662200 | -6041.636622 | 10.3  |
| <b>Ni(II)(sbp)-8OTf(C)</b> | -6040.362550 | 0.662284 | -6041.665492 | -7.8  |
| <b>Ni(II)(sp)-8OTf(C)</b>  | -6040.371046 | 0.662211 | -6041.673259 | -12.7 |
| coct-OTf (5d) (D)          | -1273.788835 | 0.179496 | -1274.276773 |       |
| <b>e2-8OTf(D)</b>          | -6040.367518 | 0.663000 | -6041.657469 | -2.3  |
| <b>TS(SN)-8OTf(D)</b>      | -6040.349214 | 0.659632 | -6041.641181 | 5.8   |
| <b>Ni(II)(sbp)-8OTf(D)</b> | -6040.364406 | 0.661556 | -6041.666064 | -8.6  |
| <b>TS(5c)-8OTf(D)</b>      | -6040.358989 | 0.660730 | -6041.646172 | 3.4   |
| <b>Ni(II)(sbp)-8OTf(D)</b> | -6040.368464 | 0.659854 | -6041.662060 | -7.2  |
| <b>Ni(II)(sp)-8OTf(D)</b>  | -6040.371902 | 0.662157 | -6041.674536 | -13.6 |
| PhOTf (2c)                 | -1192.907800 | 0.078911 | -1193.286274 |       |
| <b>e2-PhOTf</b>            | -5959.464762 | 0.560359 | -5960.639579 | 11.3  |
| <b>TS(SN)-PhOTf</b>        | -5959.445830 | 0.557900 | -5960.632263 | 14.4  |
| <b>TS(5c)-PhOTf</b>        | -5959.452830 | 0.560181 | -5960.632665 | 15.6  |
| <b>Ni(II)(sp)-PhOTf</b>    | -5959.494556 | 0.561715 | -5960.693038 | -21.3 |
| <b>e2-PhOTf(2)</b>         | -5959.459181 | 0.560736 | -5960.633979 | 15.1  |
| <b>e2-PhOTf(3)</b>         | -5959.462064 | 0.560034 | -5960.637405 | 12.5  |
| <b>e2-PhOTf(4)</b>         | -5959.460930 | 0.560335 | -5960.636009 | 13.6  |
| <b>e2-PhOTf(5)</b>         | -5959.464031 | 0.560829 | -5960.638716 | 12.2  |
| <b>e2-PhOTf(6)</b>         | -5959.462831 | 0.560028 | -5960.637989 | 12.1  |
| 2-PyOTf (2b)               | -1208.961880 | 0.067800 | -1209.342590 |       |
| <b>e2a-2PyOTf</b>          | -5975.523354 | 0.548712 | -5976.699835 | 8.5   |
| <b>TS(SN)-2PyOTf</b>       | -5975.519311 | 0.548062 | -5976.702137 | 6.7   |
| <b>Ni(II)(sbp)-2PyOTf</b>  | -5975.554572 | 0.548979 | -5976.750328 | -23.0 |
| <b>TS(5c)-2PyOTf</b>       | -5975.519117 | 0.549987 | -5976.700480 | 8.9   |
| <b>e2f-2PyOTf</b>          | -5975.513985 | 0.550368 | -5976.690524 | 15.4  |
| <b>e2g-2PyOTf</b>          | -5975.516938 | 0.549254 | -5976.695211 | 11.8  |
| <b>e2h-2PyOTf</b>          | -5975.518134 | 0.548988 | -5976.695507 | 11.4  |
| <b>e2b-2PyOTf</b>          | -5975.525380 | 0.549962 | -5976.702644 | 7.6   |
| <b>e2c-2PyOTf</b>          | -5975.521177 | 0.548644 | -5976.697559 | 9.9   |
| <b>TS(SN)-2PyOTf(c)</b>    | -5975.499394 | 0.547098 | -5976.683271 | 17.9  |
| <b>Ni(II)(sp)-2PyOTf</b>   | -5975.546745 | 0.549926 | -5976.741705 | -17.0 |
| <b>TS(5c)-2PyOTf(c)</b>    | -5975.510329 | 0.547787 | -5976.687965 | 15.4  |
| <b>Ni(II)(sp)-2PyOTf</b>   | -5975.541622 | 0.550031 | -5976.733191 | -11.6 |
| <b>e2d-2PyOTf</b>          | -5975.519320 | 0.550514 | -5976.698833 | 10.3  |
| <b>TS(SN)-2PyOTf(d)</b>    | -5975.513875 | 0.548460 | -5976.697562 | 9.8   |
| <b>Ni(II)(sp)-2PyOTf</b>   | -5975.553492 | 0.549317 | -5976.750047 | -22.6 |

|                                       |              |            |              |       |
|---------------------------------------|--------------|------------|--------------|-------|
| <b>TS(5c)-2PyOTf(d)</b>               | -5975.519019 | 0.550074   | -5976.700253 | 9.1   |
| <b>Ni(II)(sp)-2PyOTf</b>              | -5975.552085 | 0.549806   | -5976.748795 | -21.5 |
| <b>eze-2PyOTf</b>                     | -5975.519768 | 0.547442   | -5976.696064 | 10.1  |
| <b>TS(SN)-2PyOTf(e)</b>               | -5975.513875 | 0.548460   | -5976.685609 | 17.3  |
| <b>TS(5c)-2PyOTf(e)</b>               | -5975.510295 | 0.547821   | -5976.687955 | 15.4  |
| <b>Ni(II)(sp)-2PyOTf</b>              | -5975.541624 | 0.550027   | -5976.733193 | -11.6 |
| <b>ezi-2PyOTf</b>                     | -5975.520962 | 0.551009   | -5976.699746 | 10.0  |
| <b>ezj-2PyOTf</b>                     | -5975.519789 | 0.549067   | -5976.697607 | 10.2  |
| <b>ezk-2PyOTf</b>                     | -5975.522316 | 0.550805   | -5976.700766 | 9.3   |
| <b>ezi-2PyOTf</b>                     | -5975.519384 | 0.549659   | -5976.694520 | 12.5  |
| [Ni(dppf)(κ-N-2-PyOTf)]               | -5975.512475 | 0.549117   | -5976.681764 | 20.1  |
| [Ni(dppf)(κ-N-2-PyOTf) <sub>2</sub> ] | -7184.467297 | 0.645245   |              |       |
| 3-PyOTf ( <b>2d</b> )                 | -1208.954059 | 0.067579   | -1209.333231 |       |
| <b>e2c-3PyOTf</b>                     | -5975.515764 | 0.549503   | -5976.690956 | 8.9   |
| <b>TS(SN)-3PyOTf(c)</b>               | -5975.492612 | 0.547524   | -5976.678490 | 15.5  |
| <b>TS(5c)-3PyOTf</b>                  | -5975.500620 | 0.547495   | -5976.677969 | 15.8  |
| <b>e2f-3PyOTf</b>                     | -5975.506552 | 0.549988   | -5976.680374 | 15.8  |
| <b>e2g-3PyOTf</b>                     | -5975.509569 | 0.548474   | -5976.681682 | 14.0  |
| <b>e2h-3PyOTf</b>                     | -5975.507697 | 0.548276   | -5976.681981 | 13.7  |
| <b>e2b-3PyOTf</b>                     | -5975.513478 | 0.549408   | -5976.690469 | 9.1   |
| <b>e2d-3PyOTf</b>                     | -5975.514549 | 0.548479   | -5976.689129 | 9.4   |
| <b>TS(SN)-3PyOTf(d)</b>               | -5975.490725 | 0.547654   | -5976.671167 | 20.1  |
| <b>TS(5c)-3PyOTf(d)</b>               | -5975.499872 | 0.548431   | -5976.678253 | 16.2  |
| <b>eze-3PyOTf</b>                     | -5975.511737 | 0.549310   | -5976.685830 | 12.0  |
| <b>TS(SN)-3PyOTf(e)</b>               | -5975.492208 | 0.547483   | -5976.671697 | 19.7  |
| <b>TS(5c)-3PyOTf(e)</b>               | -5975.499578 | 0.548432   | -5976.677790 | 16.5  |
| <b>e2a-3PyOTf</b>                     | -5975.513683 | 0.548948   | -5976.689519 | 9.4   |
| <b>TS(SN)-3PyOTf</b>                  | -5975.491593 | 0.546035   | -5976.678799 | 14.3  |
| <b>TS(5c)-3PyOTf(a)</b>               | -5975.499947 | 0.548453   | -5976.677901 | 16.4  |
| <b>e2i-3PyOTf</b>                     | -5975.511949 | 0.549528   | -5976.688794 | 10.2  |
| <b>ezj-3PyOTf</b>                     | -5975.511726 | 0.549556   | -5976.687192 | 11.3  |
| <b>ezk-3PyOTf</b>                     | -5975.512008 | 0.548607   | -5976.684117 | 12.6  |
| <b>e2l-3PyOTf</b>                     | -5975.511390 | 0.549309   | -5976.685160 | 12.4  |
| <b>Ni(II)-3PyOTf</b>                  | -5975.545077 | 0.55015308 | -5976.744105 | -24.1 |
| [Ni(dppf)(κ-N-3-PyOTf) <sub>2</sub> ] | -7184.465816 | 0.64311232 | -7186.028678 | 22.4  |
| Cyclopentene                          | -195.174789  | 0.088916   | -195.313046  |       |
| [Ni(e2-cyclopentene)(dppf)]           | -4961.743184 | 0.569455   | -4962.679436 | 2.6   |
| Cyclohexene                           | -234.455186  | 0.116954   | -234.628763  |       |
| [Ni(e2-cyclohexene)(dppf)] boat       | -5001.012257 | 0.59668438 | -5001.983944 | 9.1   |
| [Ni(e2-cyclohexene)(dppf)] chair      | -5001.017877 | 0.59752506 | -5001.989659 | 6.0   |
| Cycloheptene (boat)                   | -273.717168  | 0.144235   | -273.926474  |       |
| Cycloheptene (chair)                  | -273.721962  | 0.143979   | -273.930825  |       |
| [Ni(e2-cycloheptene)(dppf)] boat      | -5040.282205 | 0.625424   | -5041.290186 | 7.5   |
| [Ni(e2-cycloheptene)(dppf)] chair     | -5040.289371 | 0.625085   | -5041.296892 | 3.1   |
| Cyclooctene (A1)                      | -312.9917146 | 0.17189991 | -313.236148  |       |
| Cyclooctene (B1)                      | -312.9883894 | 0.17193093 | -313.233018  |       |
| Cyclooctene (C1)                      | -312.9822868 | 0.17137233 | -313.226504  |       |
| Cyclooctene (D2)                      | -312.9861446 | 0.17157079 | -313.230664  |       |

|                                 |              |            |              |      |
|---------------------------------|--------------|------------|--------------|------|
| [Ni(e2-cyclooctene)(dppf)] (A1) | -5079.561008 | 0.65294043 | -5080.604106 | 1.9  |
| [Ni(e2-cyclooctene)(dppf)] (B1) | -5079.554153 | 0.65299099 | -5080.597372 | 6.2  |
| [Ni(e2-cyclooctene)(dppf)] (C1) | -5079.547157 | 0.65344441 | -5080.590848 | 10.5 |
| [Ni(e2-cyclooctene)(dppf)] (D2) | -5079.548134 | 0.65256633 | -5080.591145 | 9.8  |

### 7.2.5 Cartesian Coordinates

Cartesian coordinates are supplied as a separate XYZ file as part of the Supporting Information associated with this publication. These can be obtained from the publisher's website.

In addition, the computational data associated with this publication, including cartesian coordinates, can be obtained from the BD<sup>20</sup> repository hosted by the Barcelona Supercomputing Centre at the DOI noted within the manuscript.

## 8 References

- 1 S. Bajo, G. Laidlaw, A. R. Kennedy, S. Sproules and D. J. Nelson, *Organometallics*, 2017, **36**, 1662–1672.
- 2 A. K. Cooper, M. E. Greaves, W. Donohoe, P. M. Burton, T. O. Ronson, A. R. Kennedy and D. J. Nelson, *Chem. Sci.*, 2021, **12**, 14074–14082.
- 3 V. J. Olsson and K. J. Szabó, *J. Org. Chem.*, 2009, **74**, 7715–7723.
- 4 G. Yin, I. Kalvet, U. Englert and F. Schoenebeck, *J. Am. Chem. Soc.*, 2015, **137**, 4164–4172.
- 5 G. R. Fulmer, A. J. M. Miller, N. H. Sherden, H. E. Gottlieb, A. Nudelman, B. M. Stoltz, J. E. Bercaw and K. I. Goldberg, *Organometallics*, 2010, **29**, 2176–2179.
- 6 X. Su, H. Huang, Y. Yuan and Y. Li, *Angew. Chem. Int. Ed.*, 2017, **56**, 1338–1341.
- 7 D. E. Frantz, D. G. Weaver, J. P. Carey, M. H. Kress and U. H. Dolling, *Org. Lett.*, 2002, **4**, 4717–4718.
- 8 T. H. Wöste and M. Oestreich, *Chem. – Eur. J.*, 2011, **17**, 11914–11918.
- 9 R. M. Oechsner, I. H. Lindenmaier and I. Fleischer, *Org. Lett.*, 2023, **25**, 1655–1660.
- 10 X. J. Lei Anusha; Abou Shama, Mhd A. ; Stafford, Jamie M. ; Cao, Billy, *Synthesis*, 2015, **47**, 2578–2585.
- 11 K. C. Nicolaou, H. Zhang, A. Ortiz and P. Dagneau, *Angew. Chem. Int. Ed.*, 2008, **47**, 8605–8610.
- 12 J.-H. Li and W.-J. Liu, *Org. Lett.*, 2004, **6**, 2809–2811.
- 13 P. Pracht, F. Bohle and S. Grimme, *Phys. Chem. Chem. Phys.*, 2020, **22**, 7169–7192.
- 14 S. Grimme, A. Hansen, S. Ehlert and J.-M. Mewes, *J. Chem. Phys.*, 2021, **154**, 064103.
- 15 F. Neese, *WIREs Comput. Mol. Sci.*, 2025, **15**, e70019.
- 16 N. Mardirossian and M. Head-Gordon, *J. Chem. Phys.*, 2016, **144**, 214110.
- 17 J. Zheng, X. Xu and D. G. Truhlar, *Theor. Chem. Acc.*, 2011, **128**, 295–305.
- 18 A. V. Marenich, C. J. Cramer and D. G. Truhlar, *J. Phys. Chem. B*, 2009, **113**, 6378–6396.
- 19 U. Neuenschwander and I. Hermans, *J. Org. Chem.*, 2011, **76**, 10236–10240.
- 20 M. Álvarez-Moreno, C. de Graaf, N. López, F. Maseras, J. M. Poblet and C. Bo, *J. Chem. Inf. Model.*, 2015, **55**, 95–103.
